# Supplementary material for: Physical Activity, Positive and Negative Symptoms of Psychosis, and General Psychopathology among People with Psychotic Disorders: A Meta-Analysis
Source: MDPI journal article supplement (doi:10.3390/jcm11102719), 2022-05-11

**Physical Activity and Positive Symptoms, Negative Symptoms and General Psychopathology Among People with Psychotic Disorders: a Meta-Analysis**

- Figure S1: Funnel Plot for All Studies Included - Positive Symptoms
- Figure S2: Funnel Plot for All Studies Included - Negative Symptoms
- Figure S3: Funnel Plot for All Included Studies - General Psychopathology
- Figure S4: Funnel Plot for Differences In Means for Positive Symptoms
- Figure S5: Funnel Plot for Differences in Means for Negative Symptoms
- Figure S6: Funnel Plot for Differences in Means for General Psychopathology

**Figure S1**

*Funnel Plot for All Studies Included - Positive Symptoms*

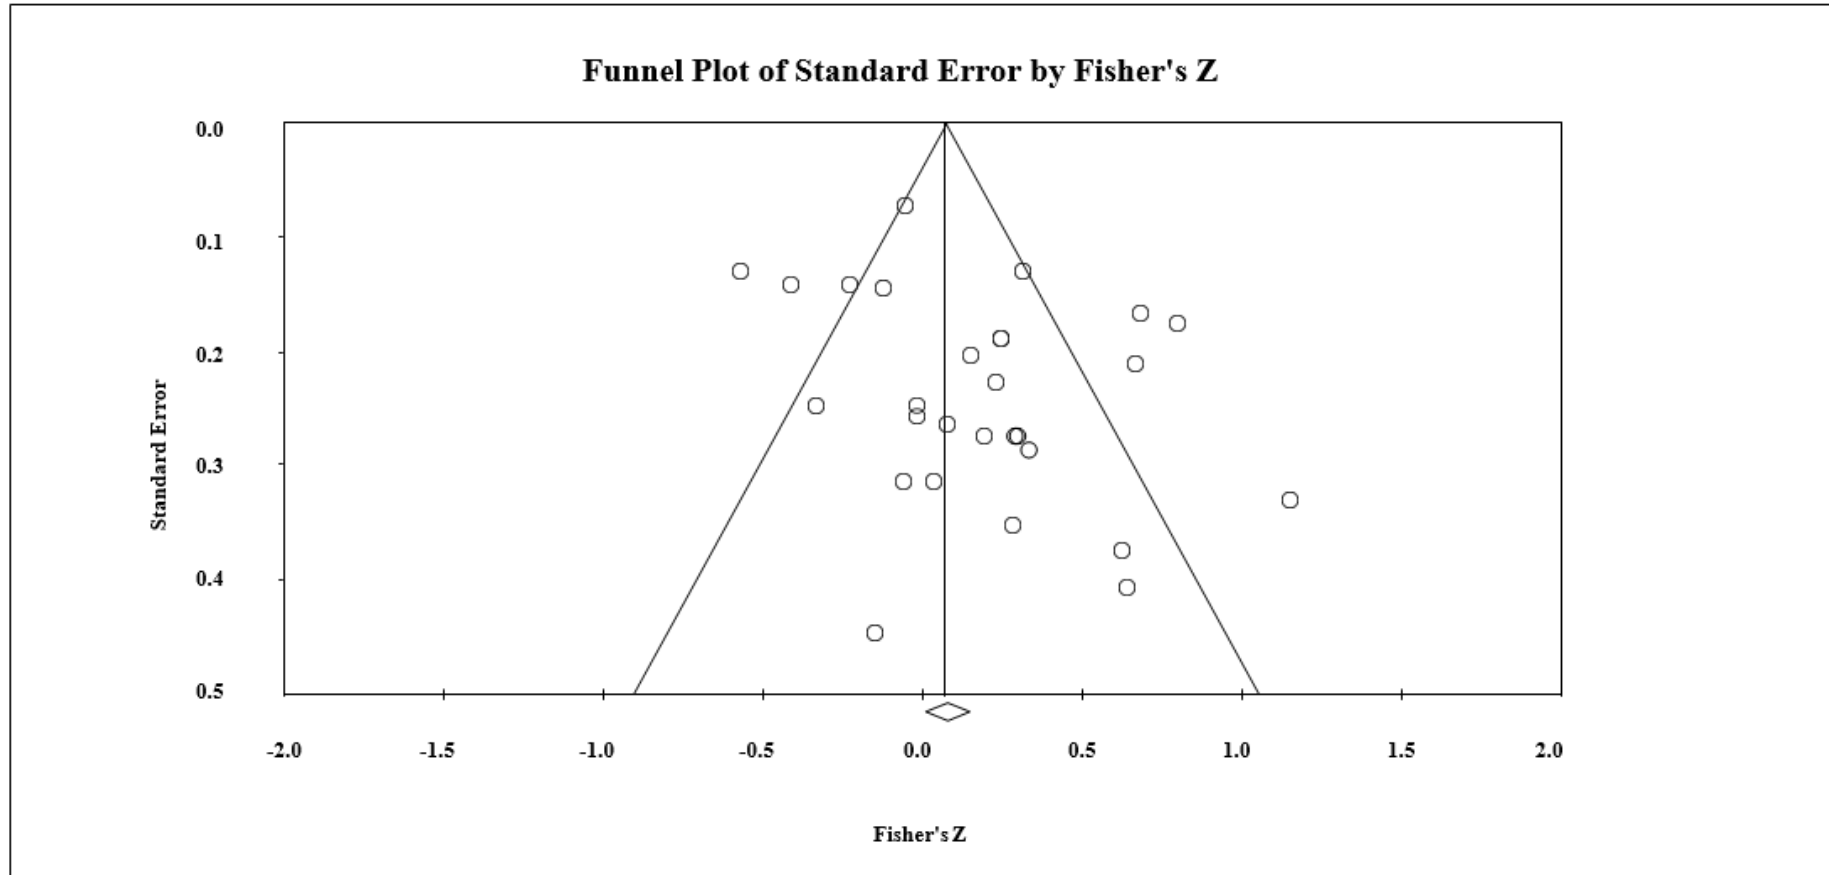

**Figure S2**

*Funnel Plot for All Studies Included - Negative Symptoms*

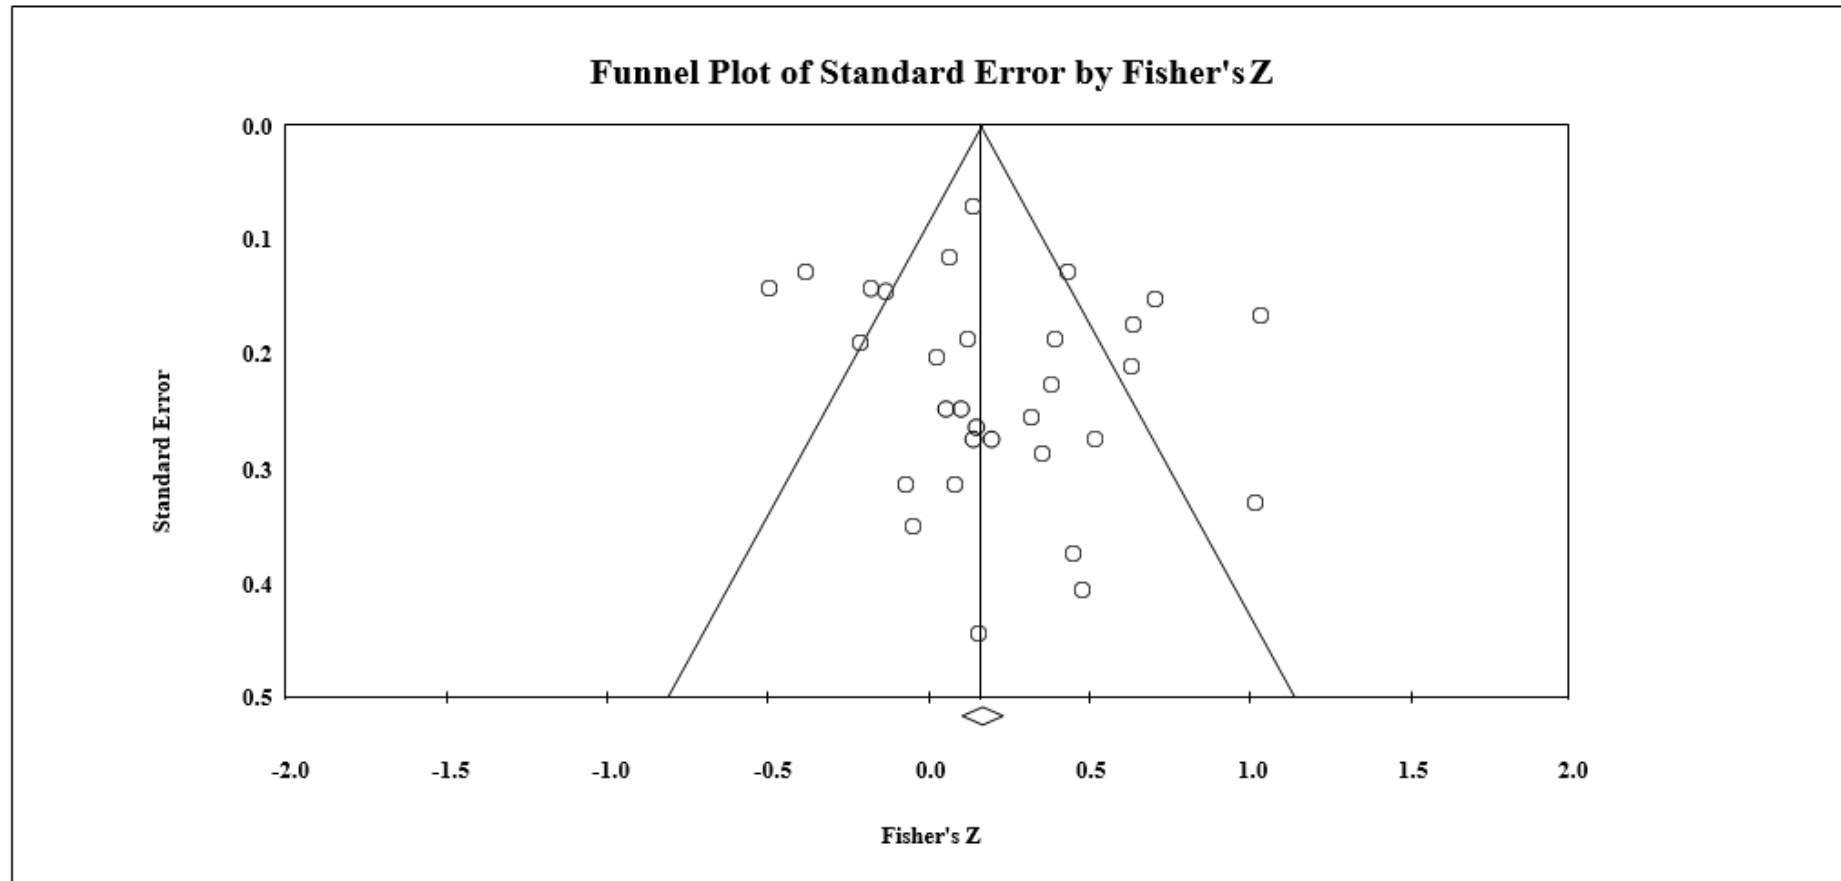

**Figure S3**

*Funnel Plot for All Included Studies - General Psychopathology*

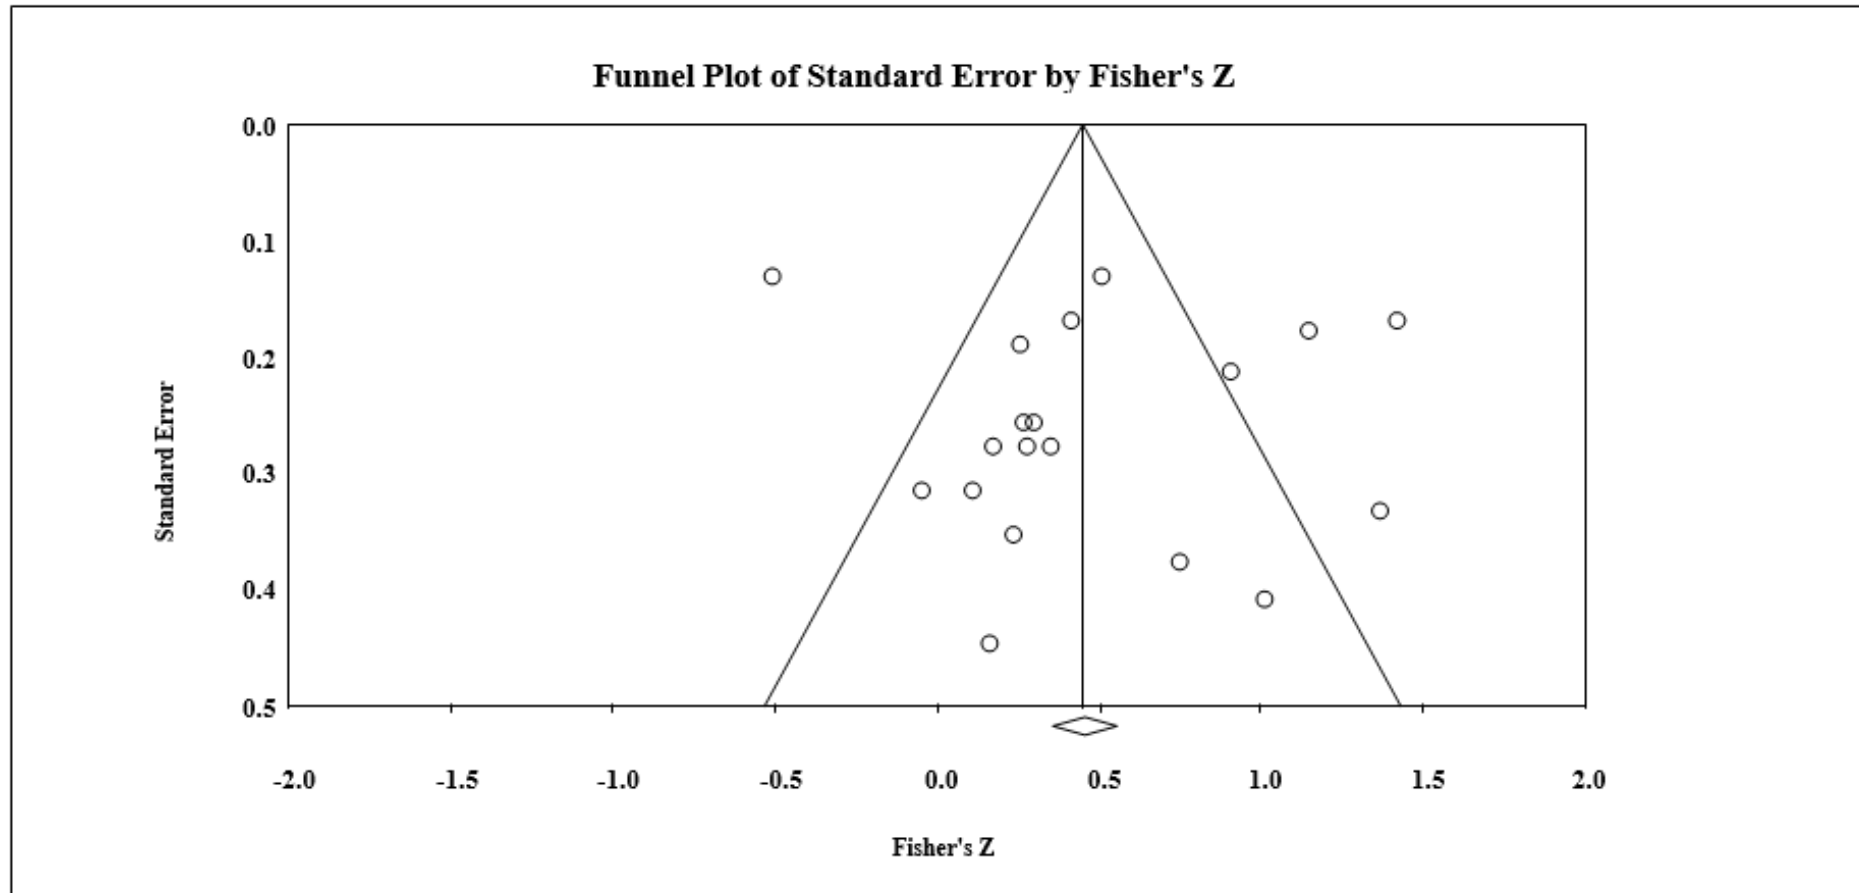

**Figure S4**

*Funnel Plot for Randomized Controlled Trials - Positive Symptoms*

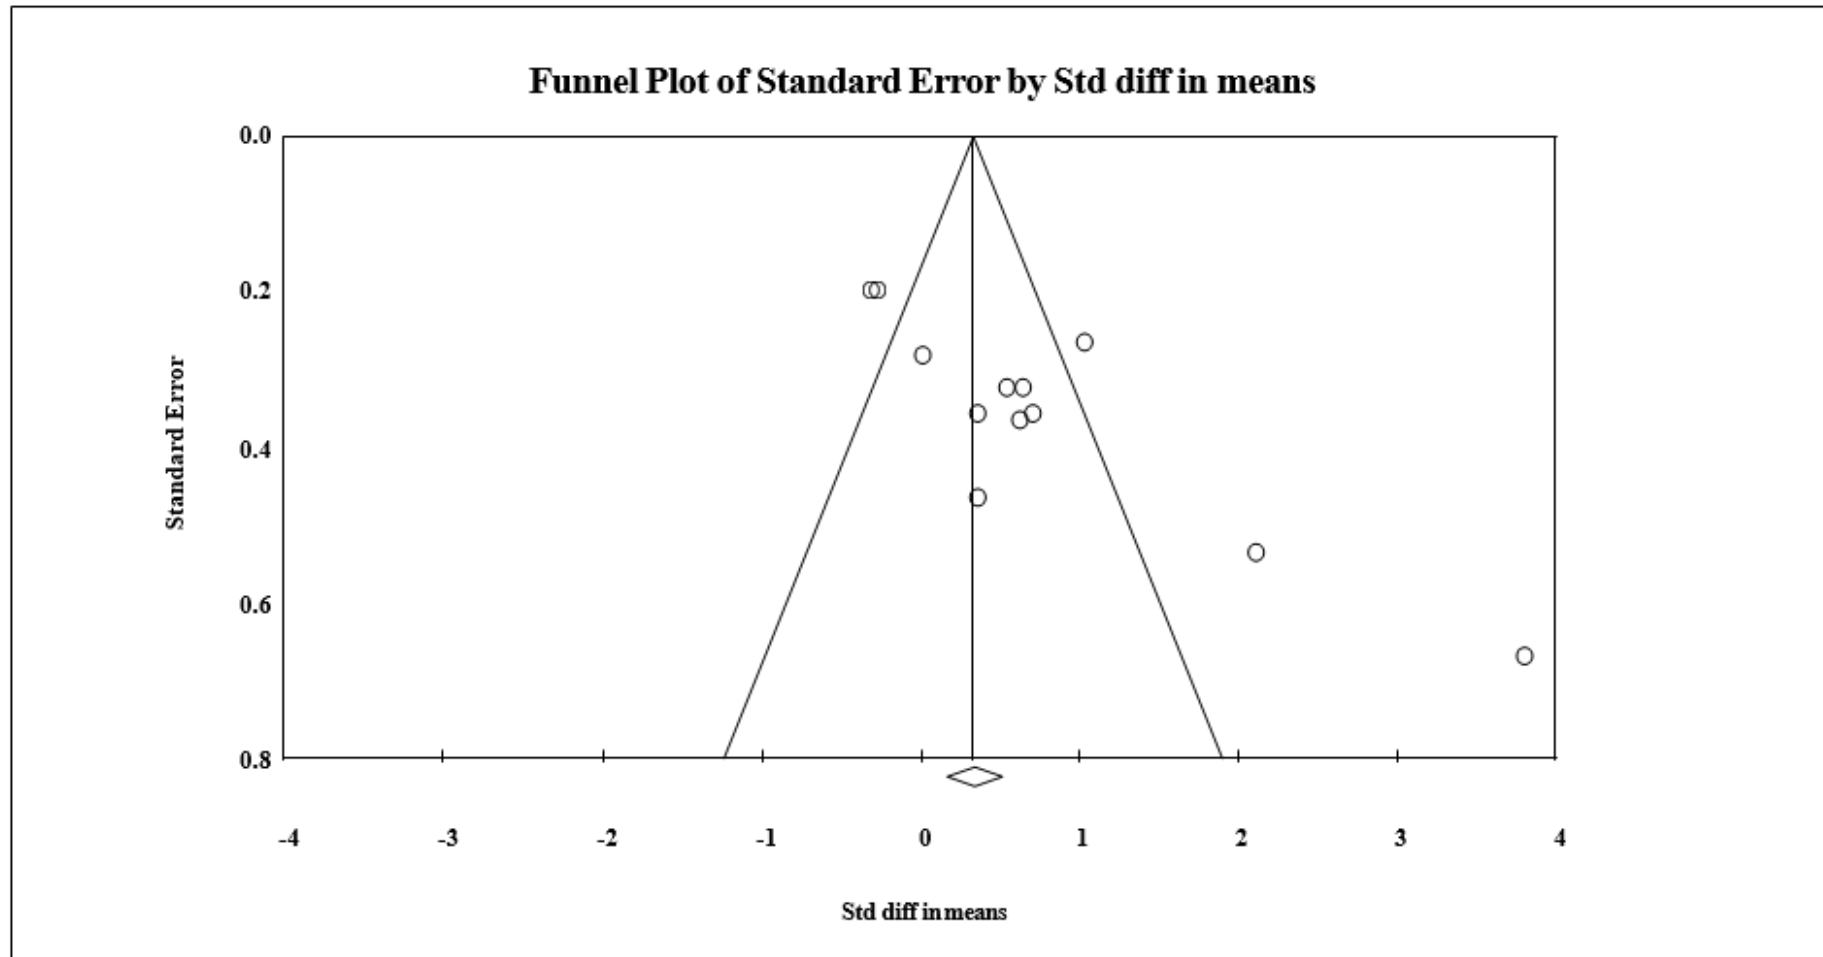

**Figure S5**

*Funnel Plot for Randomized Controlled Trials - Negative Symptoms*

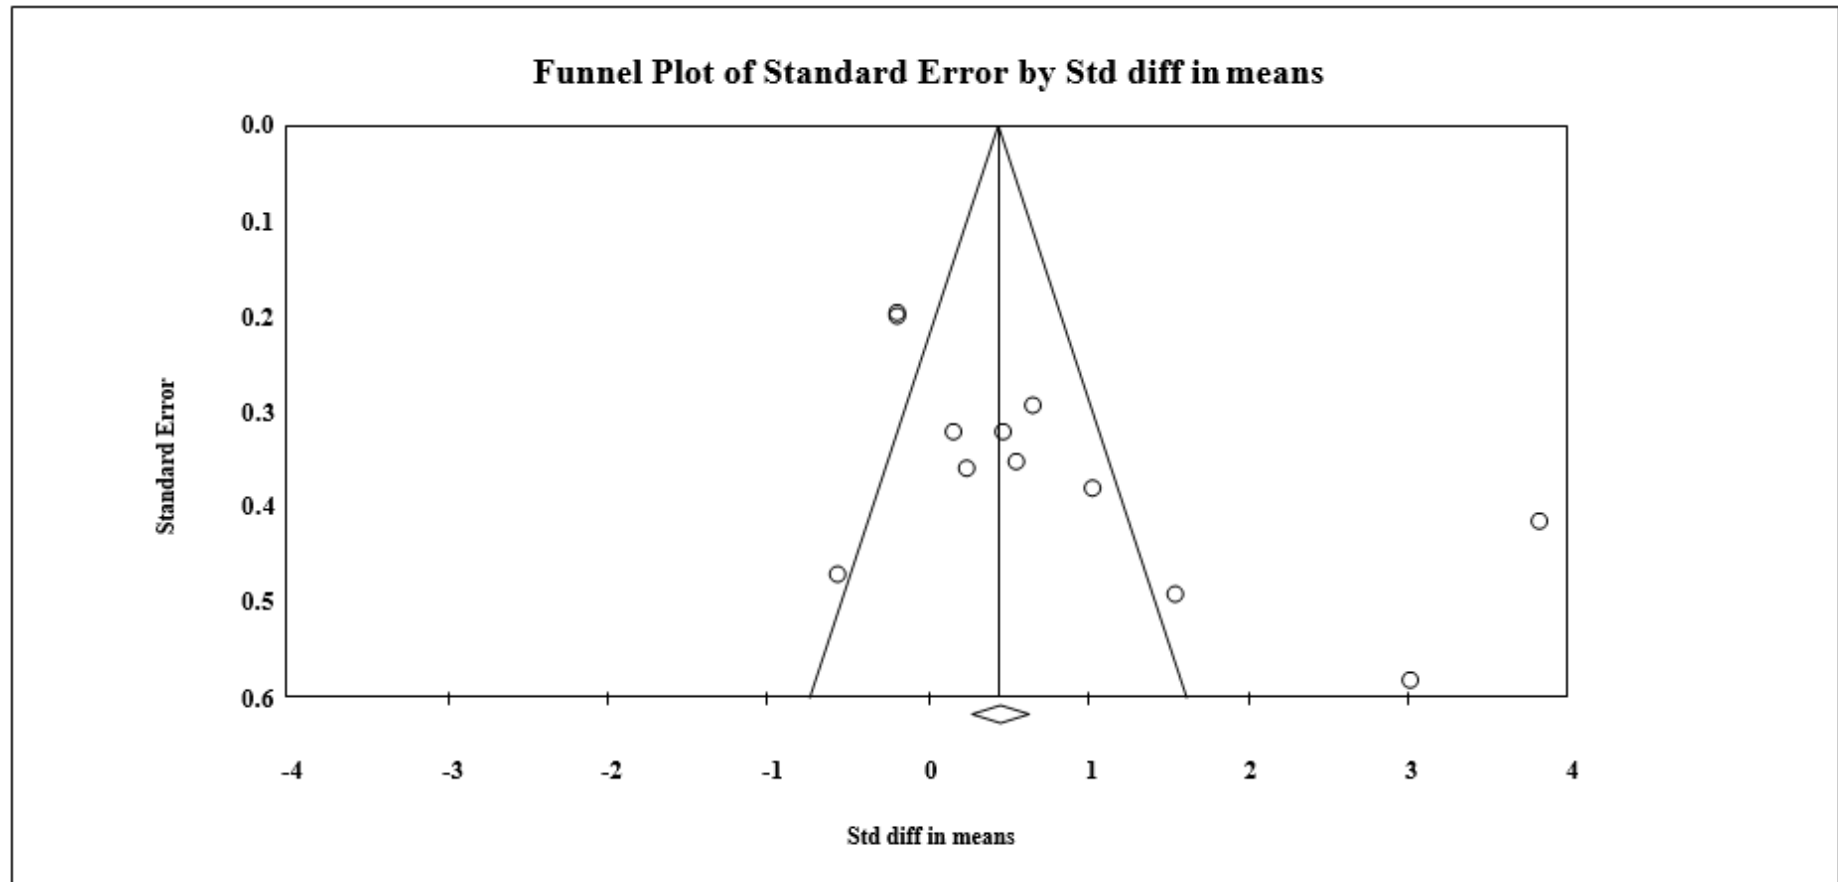

**Figure S6**

*Funnel Plot for Randomized Controlled Trials - General Psychopathology*

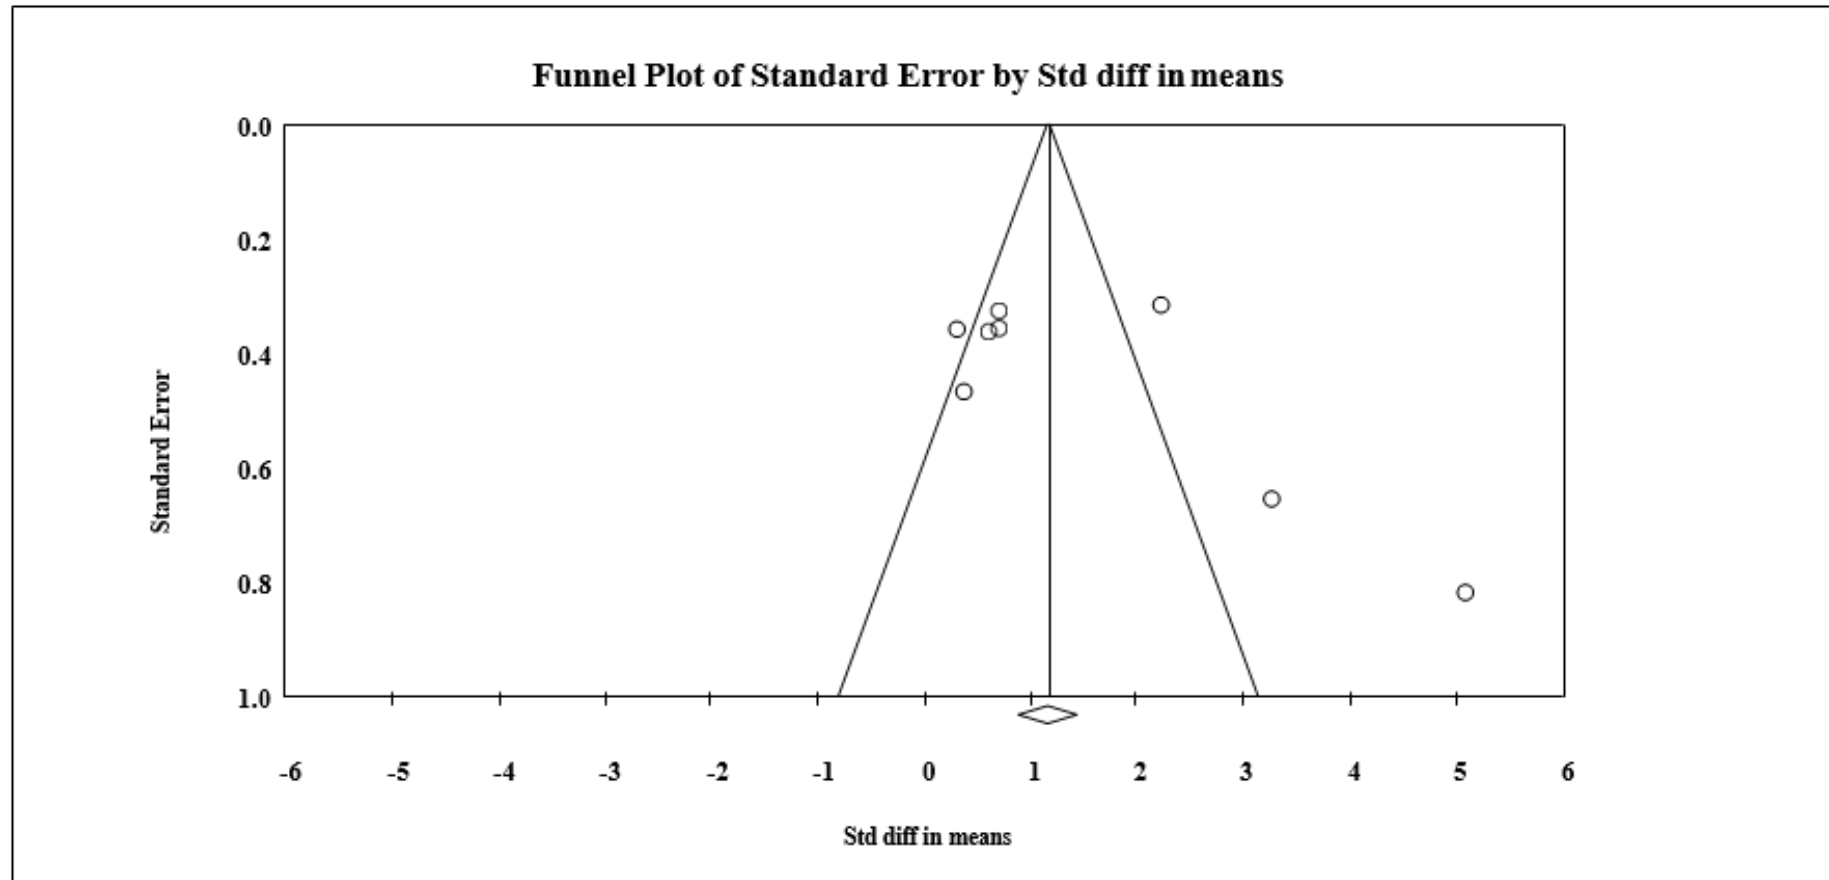

Supplement: s1 [file s1]
