# Supplementary material for: Physical Activity, Positive and Negative Symptoms of Psychosis, and General Psychopathology among People with Psychotic Disorders: A Meta-Analysis
Source: MDPI journal article supplement (doi:10.3390/jcm11102719), 2022-05-11
Supplement: s1 [file s1]

**Physical Activity and Positive Symptoms, Negative Symptoms and General Psychopathology Among People with Psychotic Disorders: a Meta-Analysis**

**Supplemental Materials 2**

- **Table S1:** Overall Effects for all Studies Included - Positive Symptoms
- **Table S2:** Moderating Effects of the Study Design in All Studies Included – Positive Symptoms
- **Table S3:** Moderating Effects of the Type of Psychotic Disorders Diagnosis in All Studies Included – Positive Symptoms
- **Table S4:** Moderating Effects of Symptom Assessment in All Studies Included – Positive Symptoms
- **Table S5:** Moderating Effects of the Study Quality in All Studies Included – Positive Symptoms
- **Table S6:** Moderating Effects of the Type of Physical Activity Intervention – Positive Symptoms
- **Table S7:** Moderating Effects of Physical Activity Intervention (Exercise, Aerobic or HIIT Intervention vs Yoga) – Positive Symptoms
- **Table S8:** Overall Effects for Randomized Controlled Trials/Controlled Trials - Positive Symptoms
- **Table S9:** Moderating Effects of the Type of Psychotic Disorders Diagnosis in Randomized Controlled Trials/Controlled Trials– Positive Symptoms
- **Table S10:** Moderating Effects of the Type of Physical Activity Intervention in Randomized Controlled Trials Included – Positive Symptoms
- **Table S11:** Overall Effects for All Type of Studies Included - Negative Symptoms

- **Table S12:** Moderating Effects of the Study Design In All Studies Included – Negative Symptoms
- **Table S13:** Moderating Effects of the Type of Diagnosis of Psychotic Disorders in All Studies Included – Negative Symptoms
- **Table S14:** Moderating Effects of Symptom Assessment in All Studies Included – Negative Symptoms
- **Table S15:** Moderating Effects of the Study Quality in All Studies Included – Negative Symptoms
- **Table S16:** Moderating Effects of the Type of Physical Activity Intervention – Negative Symptoms
- **Table S17:** Moderating Effects of the Type of Combined Physical Activity Intervention – Negative Symptoms
- **Table S18:** Overall Effects for Randomized Controlled Trials Included - Negative Symptoms
- **Table S19:** Moderating Effects of the Type of Diagnosis in Randomized Controlled Trials Included - Negative Symptoms
- **Table S20:** Moderating Effects of the Type of Physical Activity Intervention in Randomized Controlled Trials/ Controlled Trials - Negative Symptoms
- **Table S21:** Overall Effects for All Type of Studies Included – General Psychopathology
- **Table S22:** Moderating Effects of the Study Design in all Studies Included – General Psychopathology
- **Table S23:** Moderating Effects of the Type of Diagnosis of Psychotic Disorders in All Studies Included – General Psychopathology

- **Table S24:** Moderating Effects of the Study Quality in All Studies Included – General Psychopathology
- **Table S25:** Moderating Effects of the Type of Physical Activity Intervention – General Psychopathology
- **Table S26:** Moderating Effects of the Type of Physical Activity Intervention (*Exercise, Aerobic or HIIT Intervention vs Yoga*) – General Psychopathology
- **Table S27:** Overall Effects for All Randomized Controlled Trials/ Controlled Trials - General Psychopathology
- **Table S28:** Moderating Effects of the Type of Physical Activity Intervention in Randomized Controlled Trials – General Psychopathology

Table S1

Overall Effects for all Studies Included - Positive Symptoms

## Meta Analysis

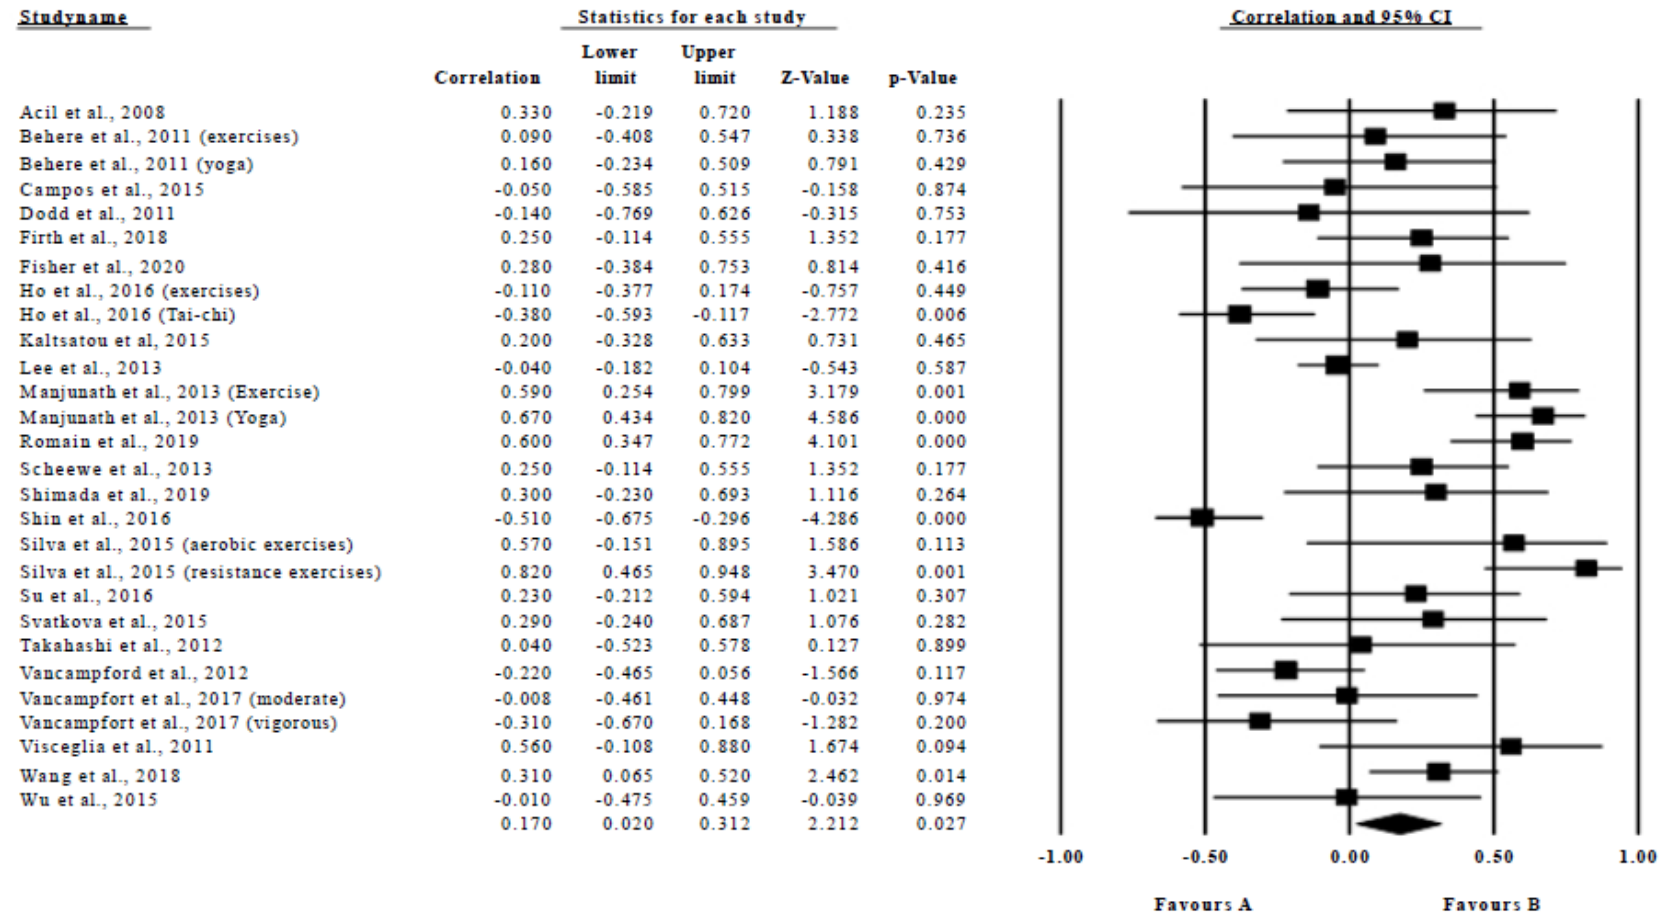

**Table S2***Moderating Effects of the Study Design in All Studies Included – Positive Symptoms***Meta Analysis**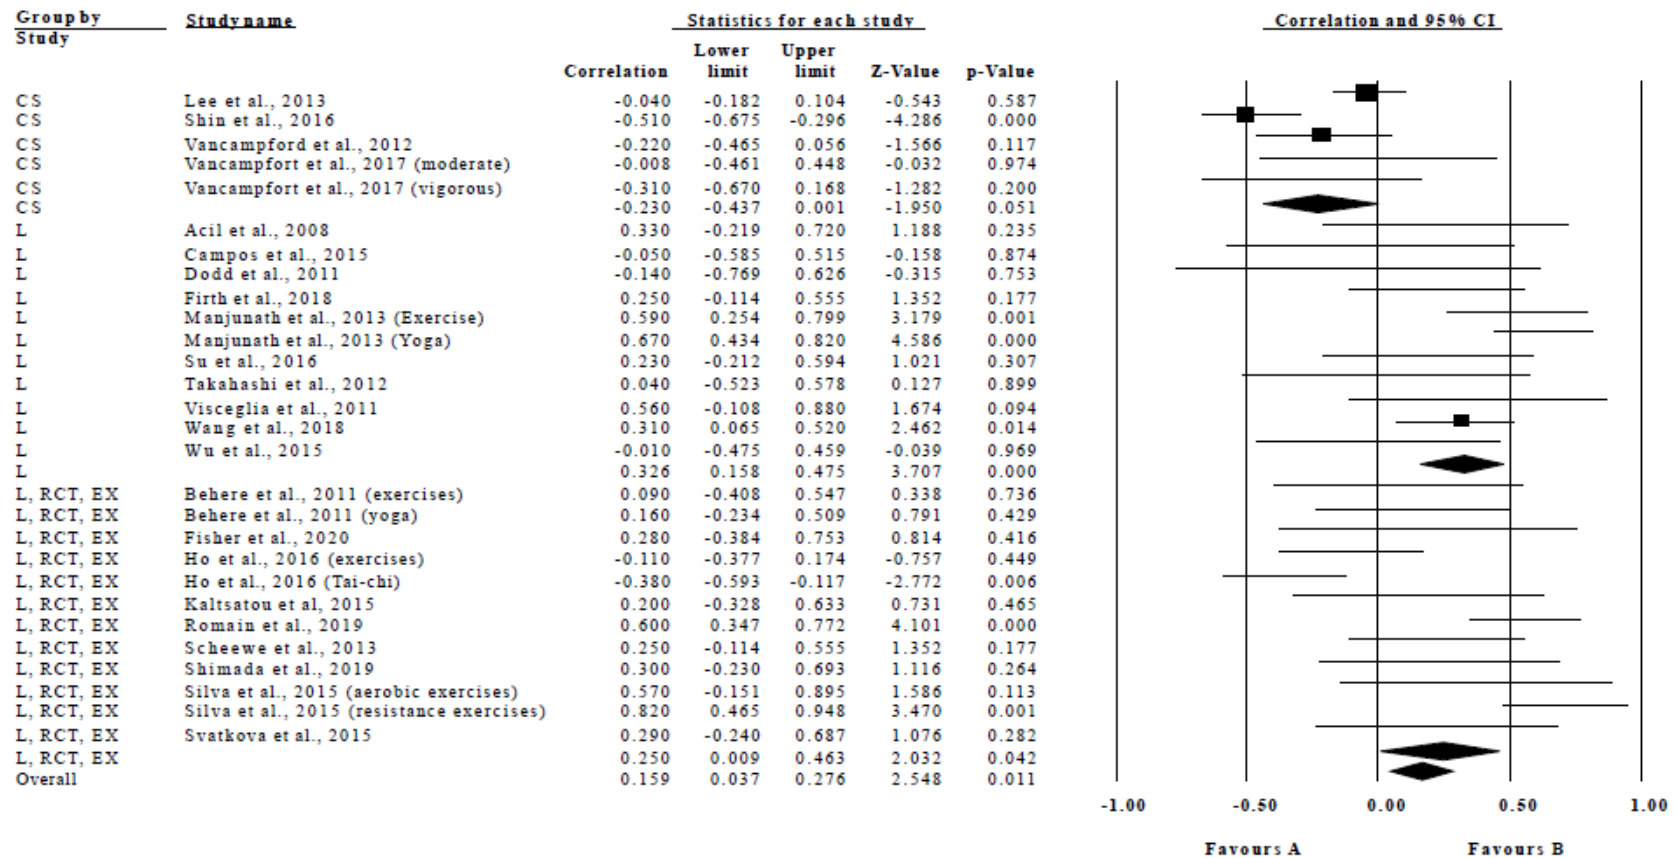

*Note:* RCT = randomized controlled trials; EX =longitudinal studies with an intervention, no control group; L = observational-longitudinal studies; CS = observational—cross sectional studies.

**Table S3**

*Moderating Effects of the Type of Psychotic Disorders Diagnosis in All Studies Included – Positive Symptoms*

## Meta Analysis

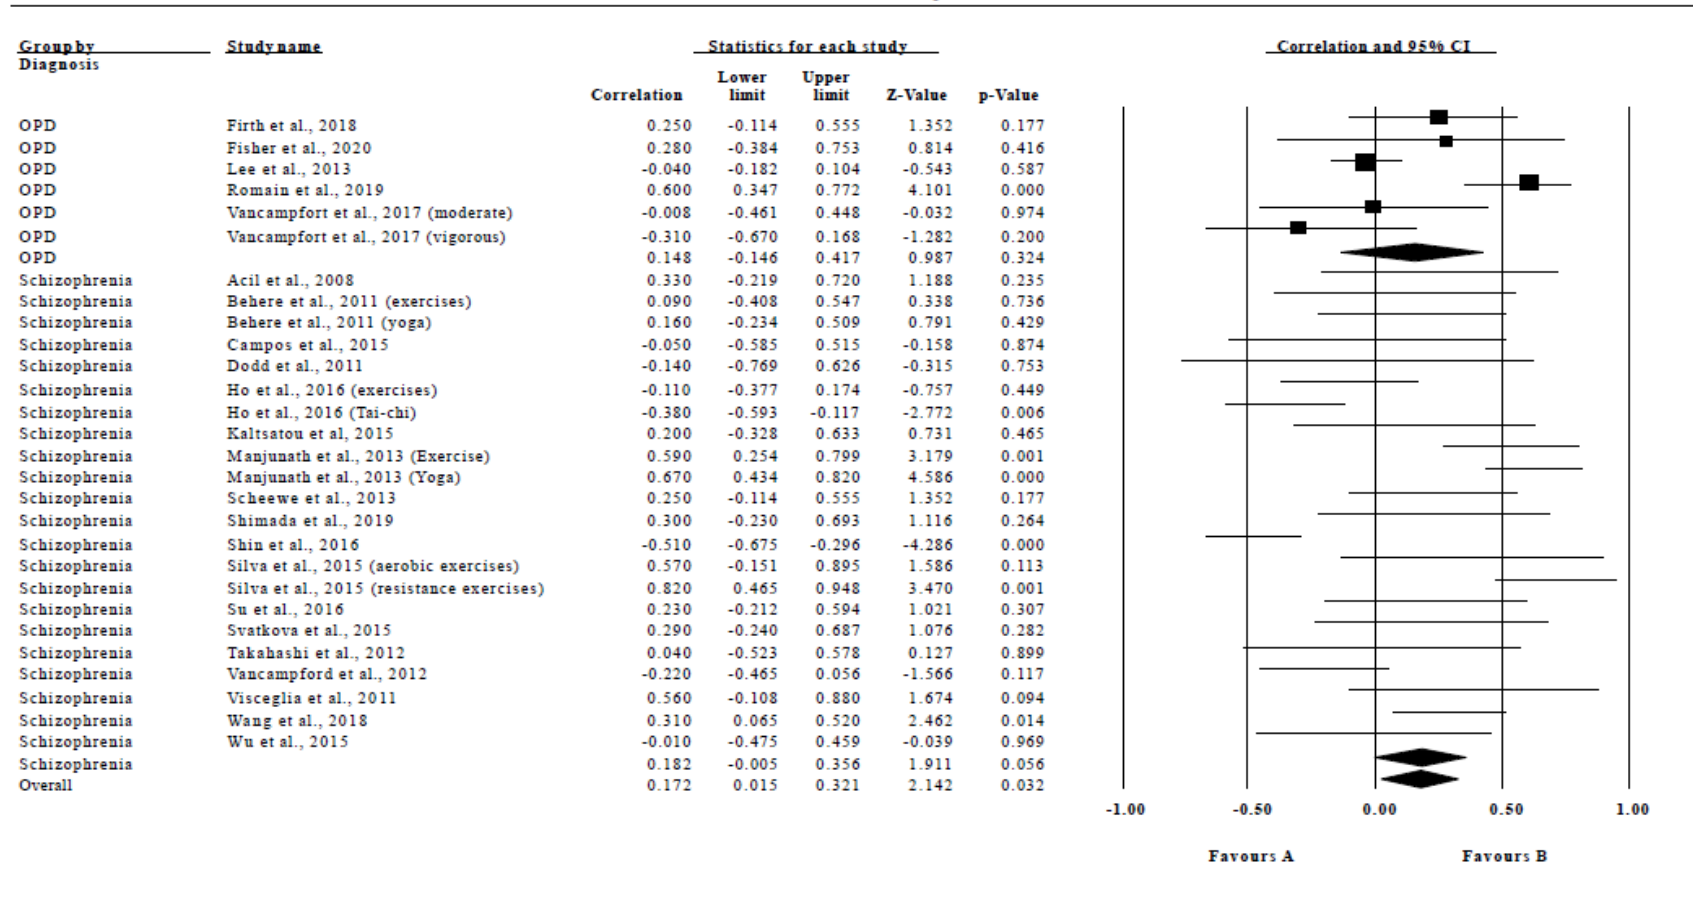

*Note:* Schizophrenia = studies enrolled people with diagnosed schizophrenia included; OPD = studies enrolled people with other psychotic disorders diagnosed.

**Table S4***Moderating Effects of Symptom Assessment in All Studies Included – Positive Symptoms*

## Meta Analysis

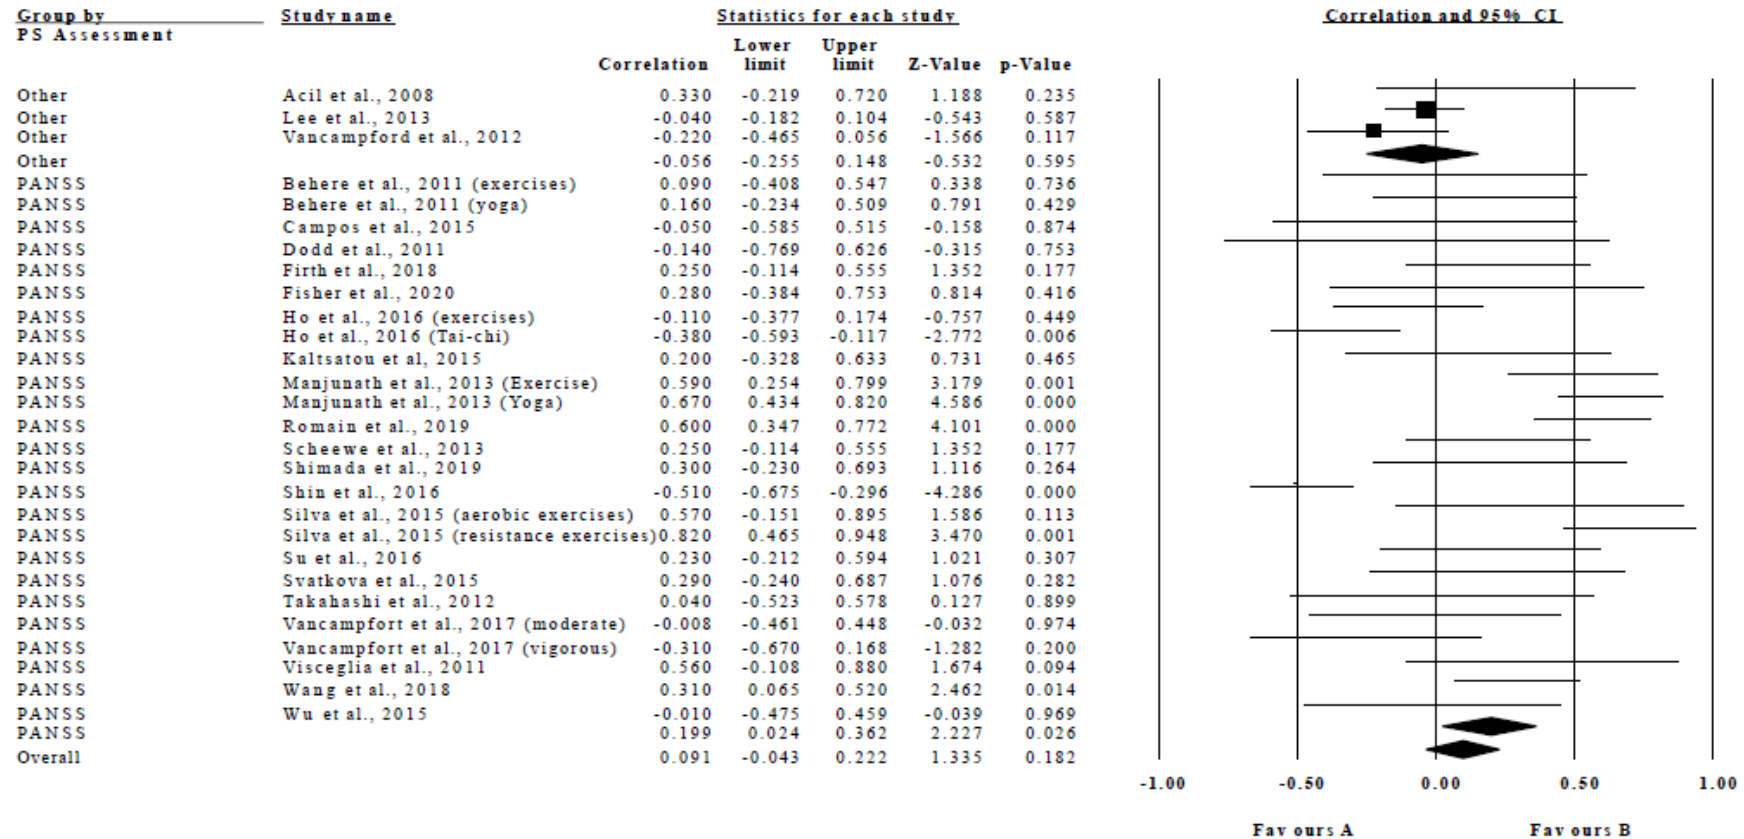

*Note:* PANSS = Positive and Negative Symptoms Scale; Other = other scales to assess the severity of positive symptoms.

**Table S5**

*Moderating Effects of the Study Quality in All Studies Included – Positive Symptoms*

## Meta Analysis

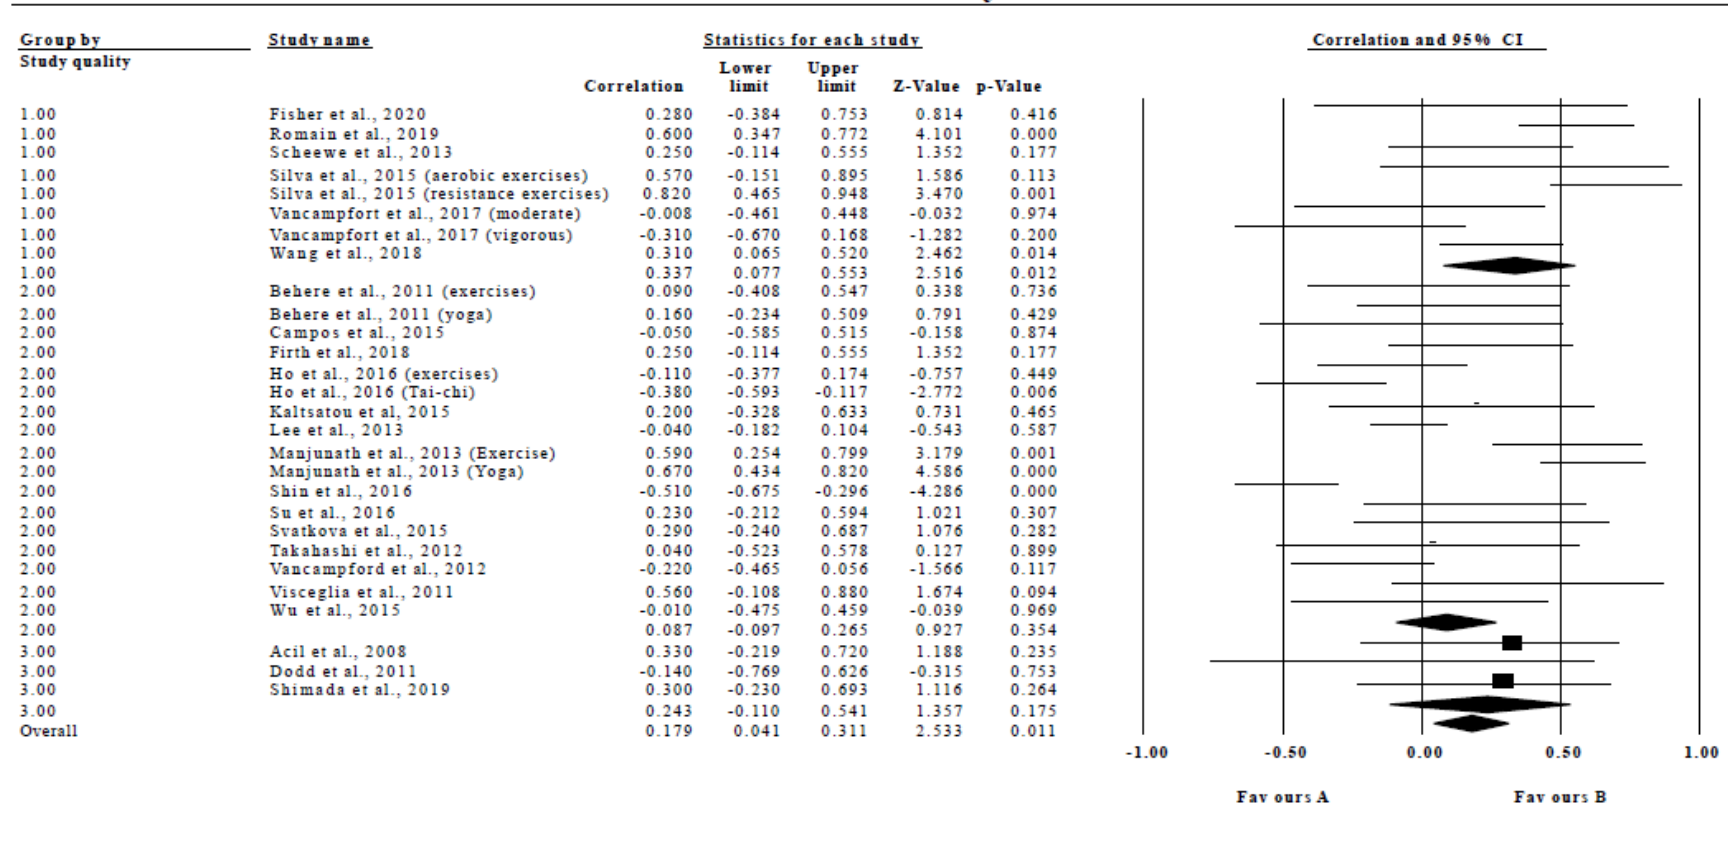

*Note:* 1 = studies with a high level of quality; 2 = studies with a moderate level of quality; 3 = studies with a low level of quality.



**Table S6**  
*Moderating Effects of the Type of Physical Activity Intervention – Positive Symptoms*

## Meta Analysis

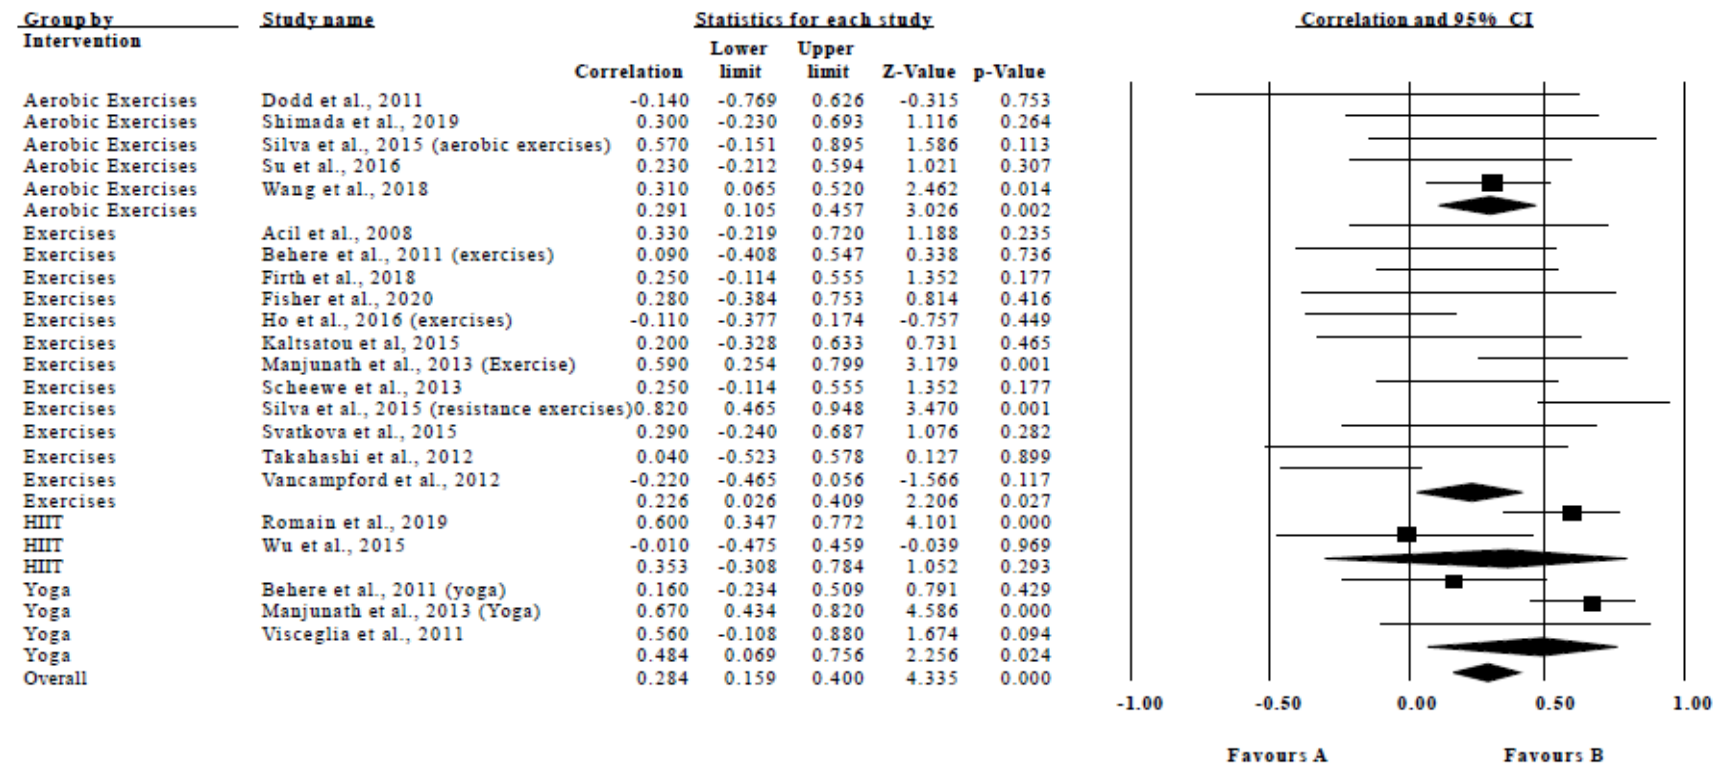

*Note:* Aerobic Exercise = studies that included aerobic exercises interventions; Exercise = studies that included interventions with various types of exercise, other than aerobic exercise or HIIT (e.g., resistance exercise); HIIT = studies that included high intensity interval training; Yoga = studies that included yoga training only.

**Table S7**

*Moderating Effects of Physical Activity Intervention (Exercise, Aerobic or HIIT Intervention vs Yoga) – Positive Symptoms*

## Meta Analysis

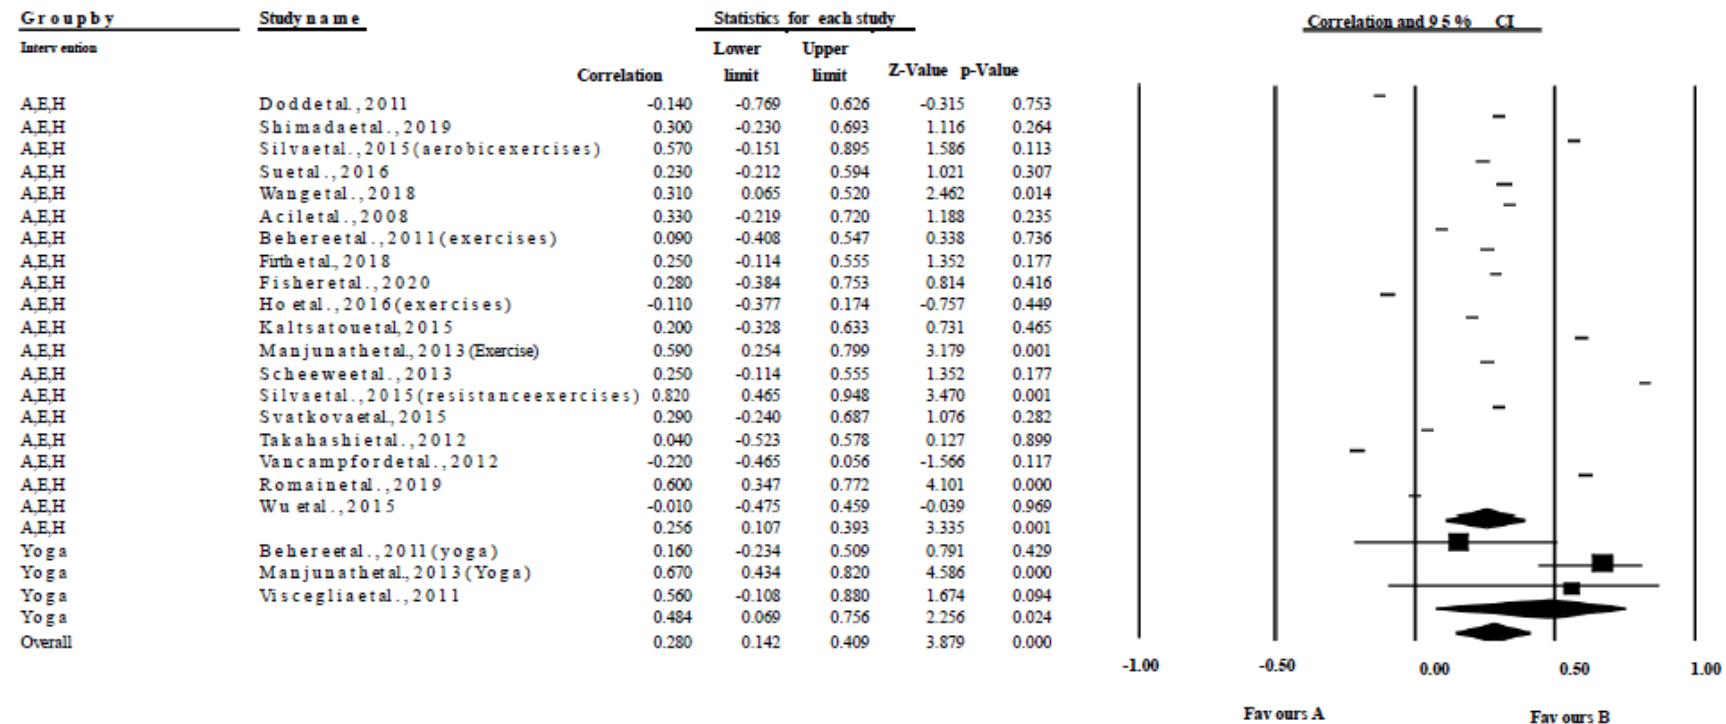

*Note:* A = Aerobic exercises; E = other exercise interventions; H = High intensity interval training; P = psychoeducation; Y = yoga.

**Table S8**

*Overall Effects for Randomized Controlled Trials/Controlled Trials - Positive Symptoms*

## Meta Analysis

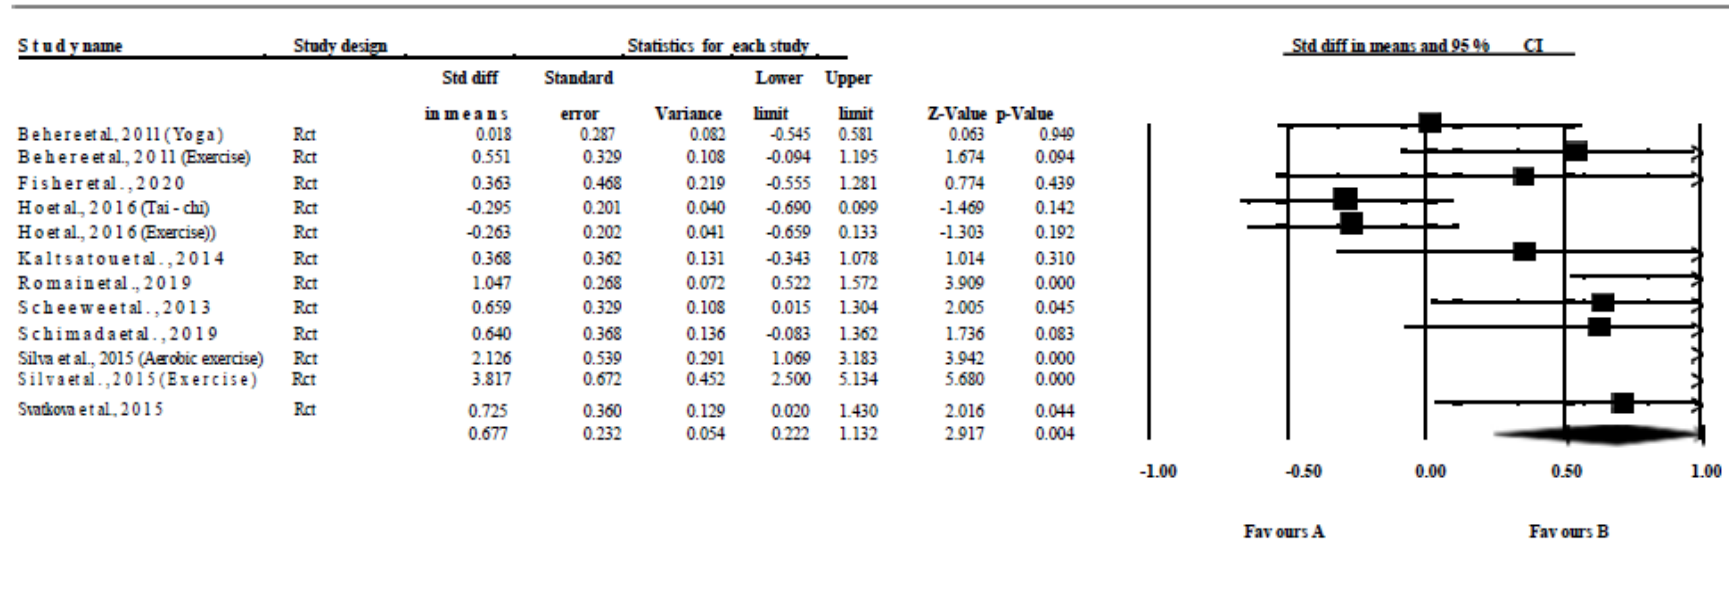

*Note:* RCT = randomized controlled trials/controlled trials.

**Table S9**

*Moderating Effects of the Type of Psychotic Disorders Diagnosis in Randomized Controlled Trials/Controlled Trials– Positive Symptoms*

## Meta Analysis

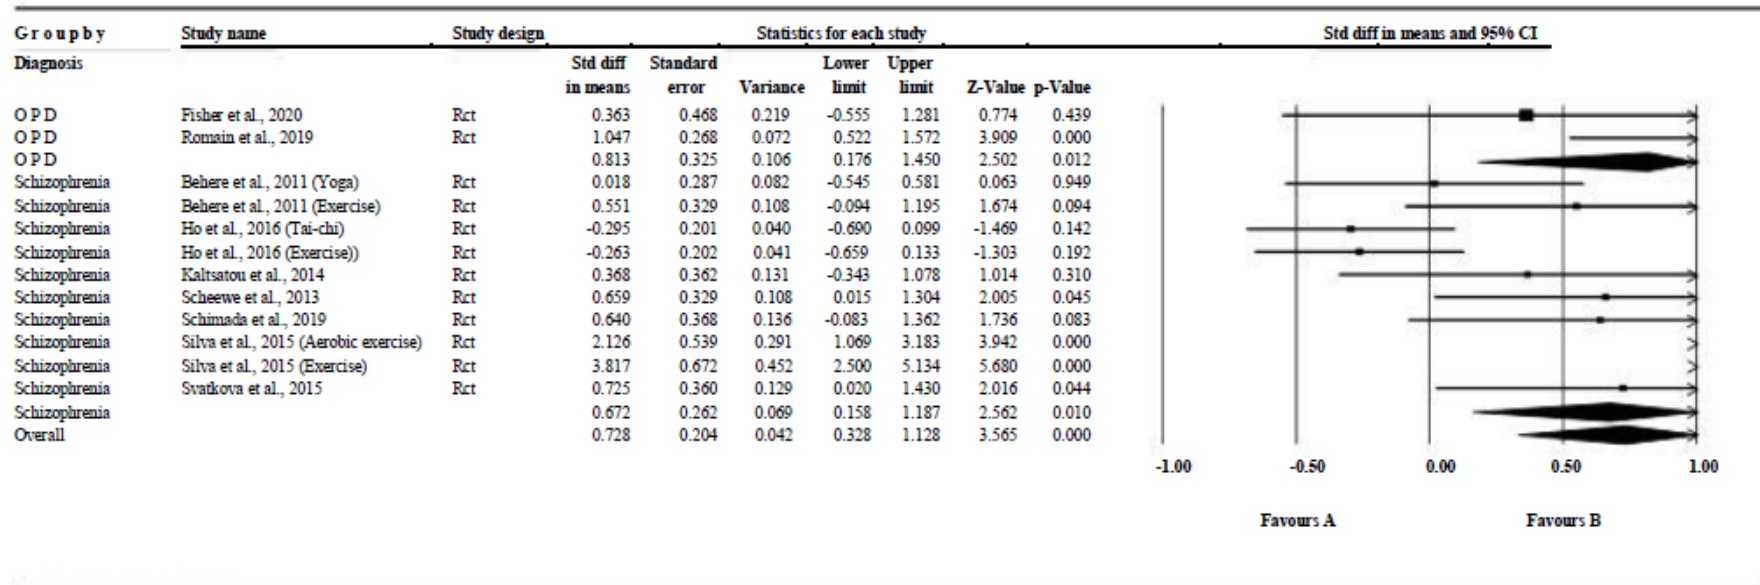

*Note:* Schizophrenia = studies enrolled people with diagnosed schizophrenia included; OPD = studies enrolled people with other psychotic disorders diagnosed; RCT = randomized controlled trials/controlled trials.

**Table S10**

*Moderating Effects of the Type of Physical Activity Intervention in Randomized Controlled Trials Included – Positive Symptoms*

## Meta Analysis

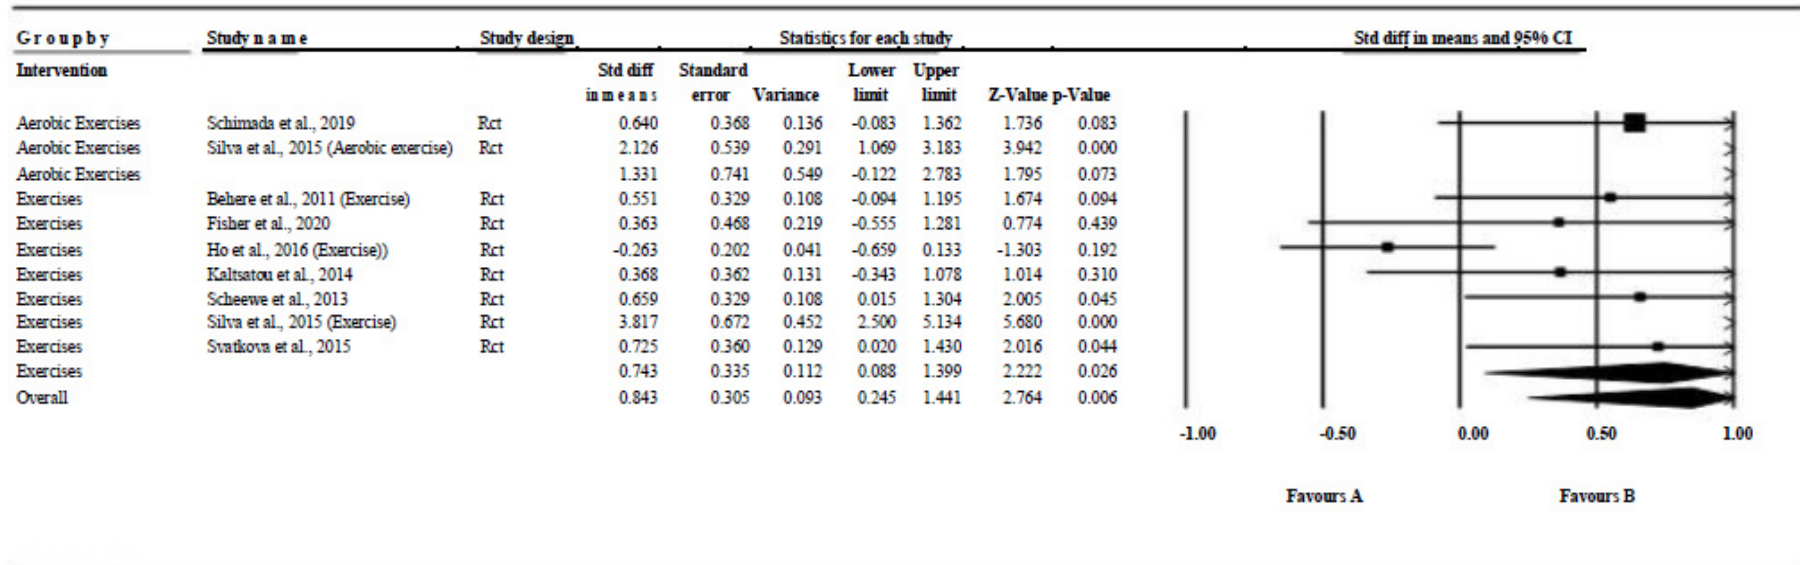

*Note:* RCT = randomized controlled trials/ controlled trials; Aerobic Exercise = studies with aerobic exercises intervention; Exercises = studies with exercise interventions other than aerobic exercise or HIIT (e.g., resistance training).

**Table S11***Overall Effects for All Type of Studies Included - Negative Symptoms***Meta Analysis**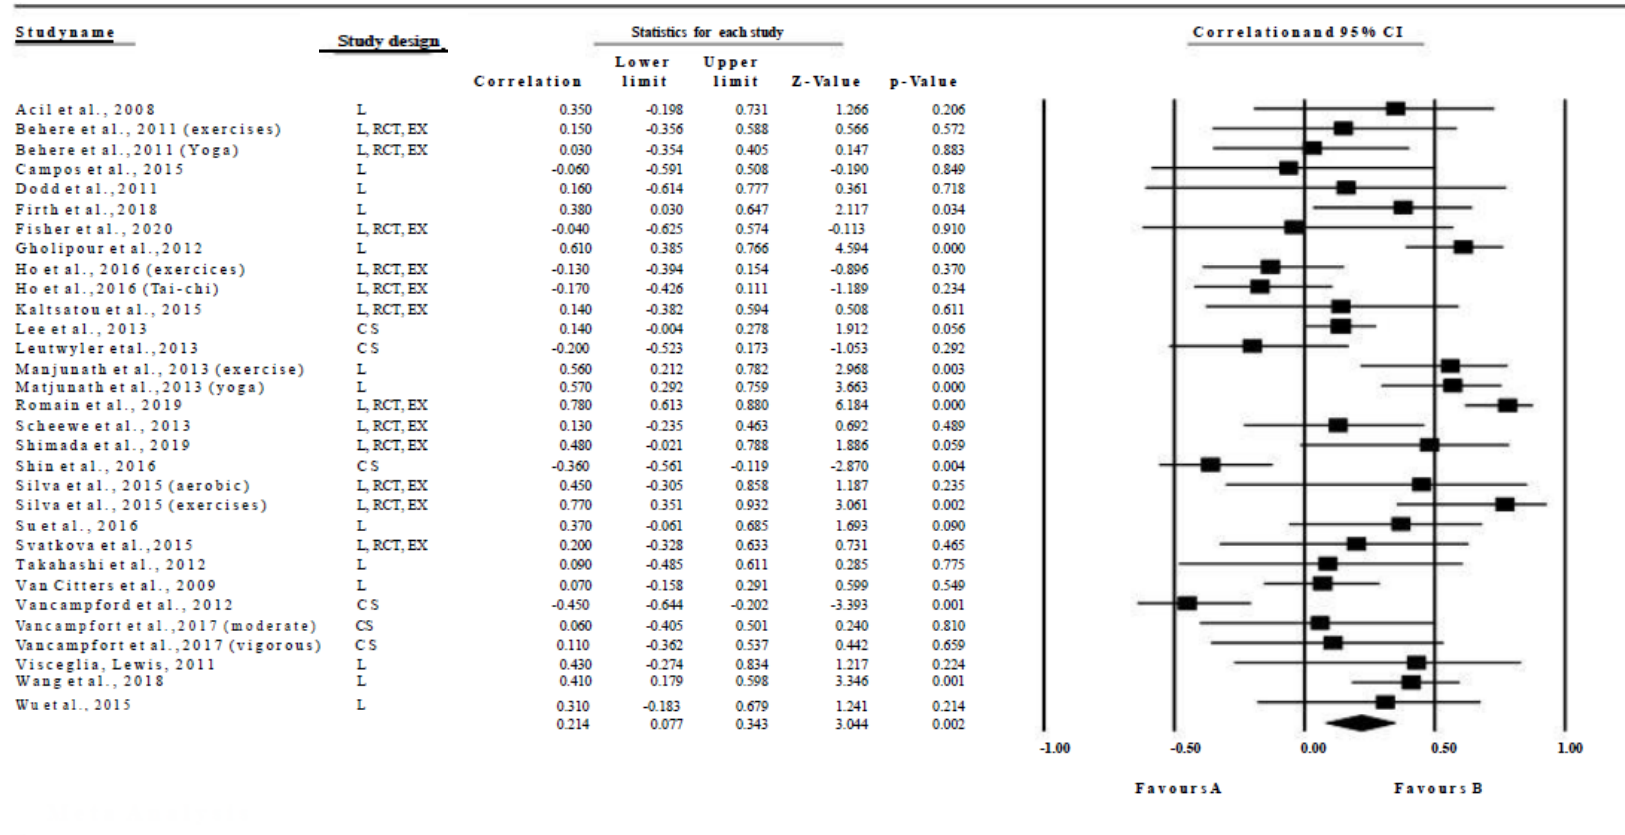

*Note:* RCT = randomized controlled trials/controlled trials; EX = longitudinal studies with an intervention, no control group; L = observational-longitudinal studies; CS = observational—cross sectional studies.

**Table S12***Moderating Effects of the Study Design In All Studies Included – Negative Symptoms***Meta Analysis**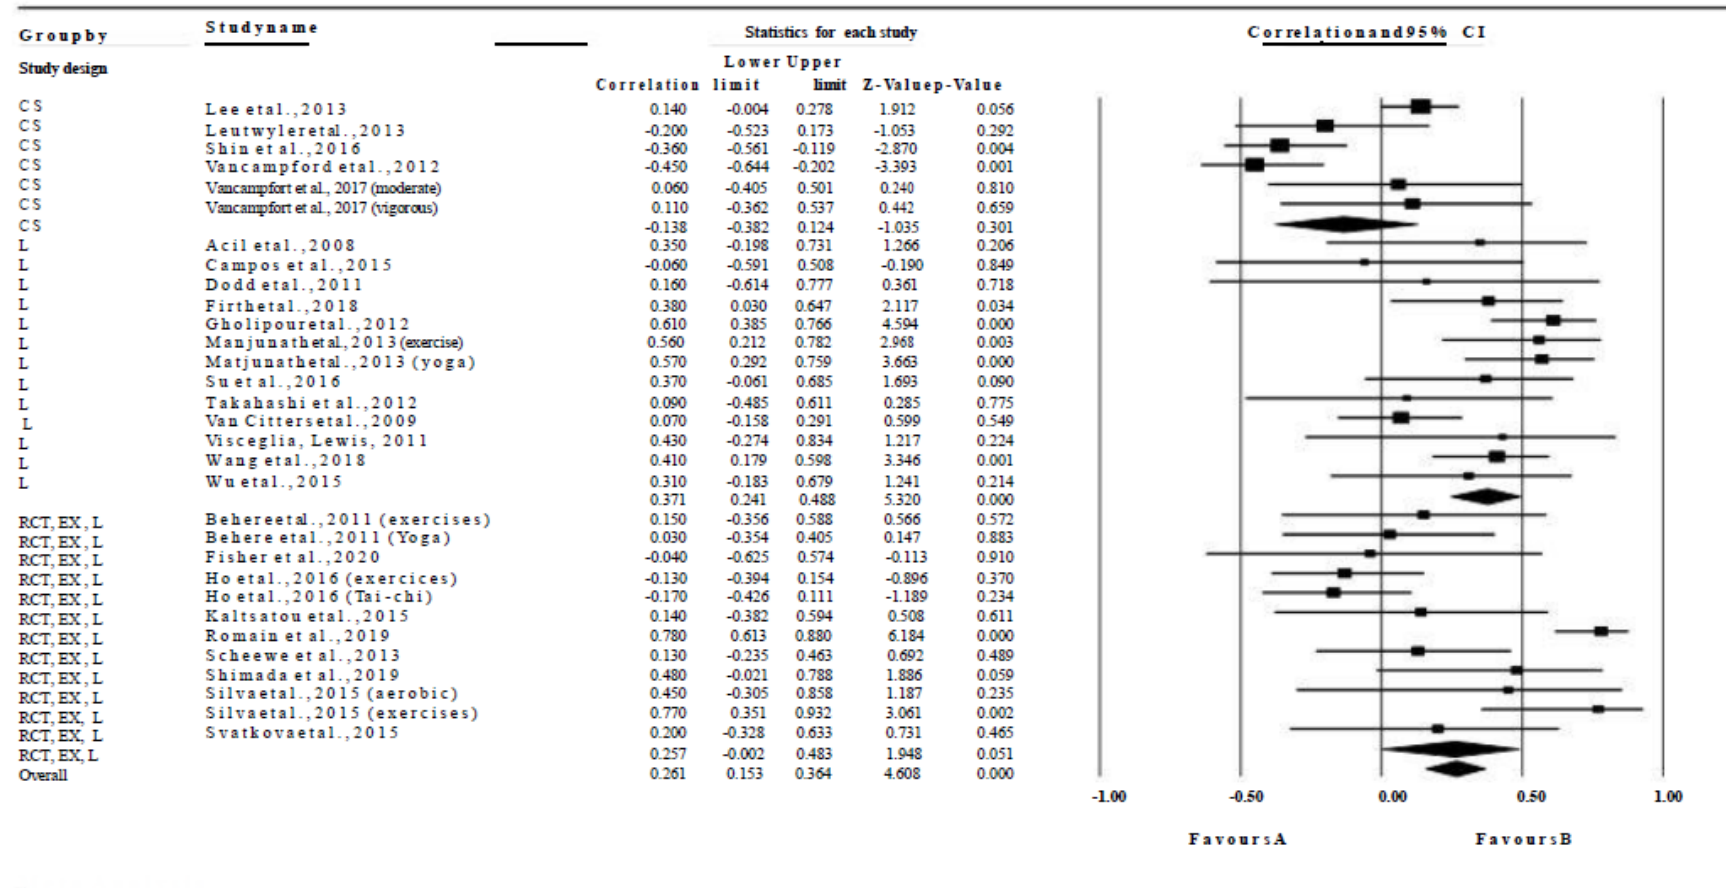

*Note:* RCT = randomized controlled trials/controlled trials; EX = longitudinal studies with an intervention, no control group; L = observational—longitudinal studies; CS = observational—cross sectional studies.



**Table S13**

*Moderating Effects of the Type of Diagnosis of Psychotic Disorders in All Studies Included – Negative Symptoms*

## Meta Analysis

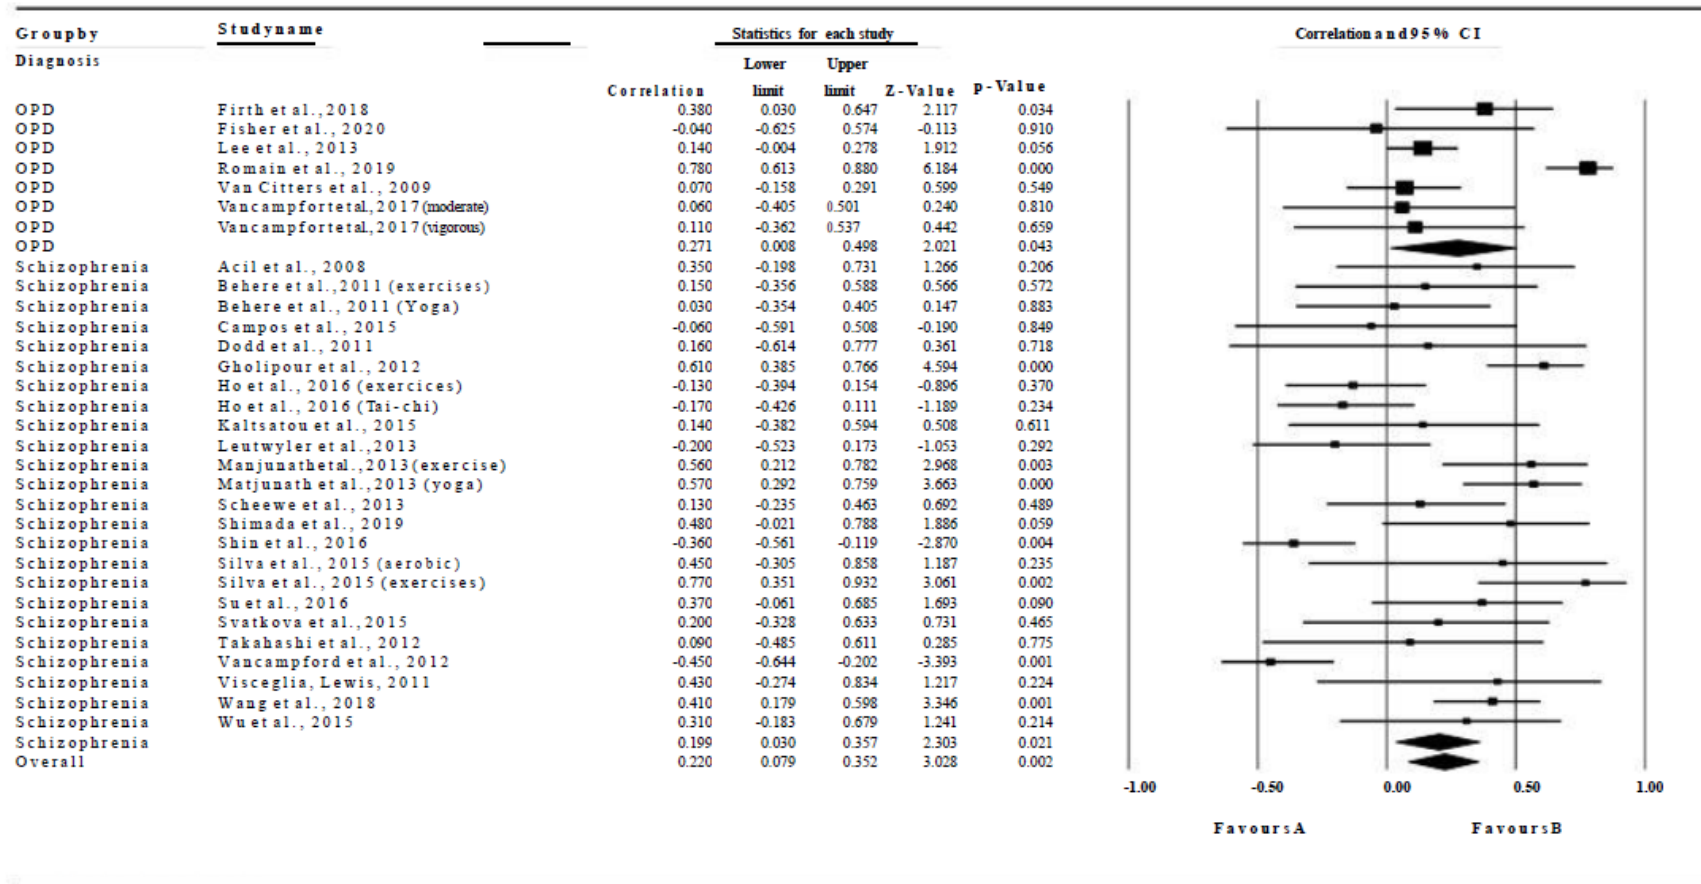

*Note:* RCT = randomized controlled trials/controlled trials; EX = longitudinal studies with an intervention, no control group; L = observational-longitudinal studies; CS = observational—cross sectional studies; Schizophrenia = studies enrolled people with diagnosed schizophrenia; OPD = studies enrolled people with other psychotic disorders diagnosed.



**Table S14**

*Moderating Effects of Symptom Assessment in All Studies Included – Negative Symptoms*

## Meta Analysis

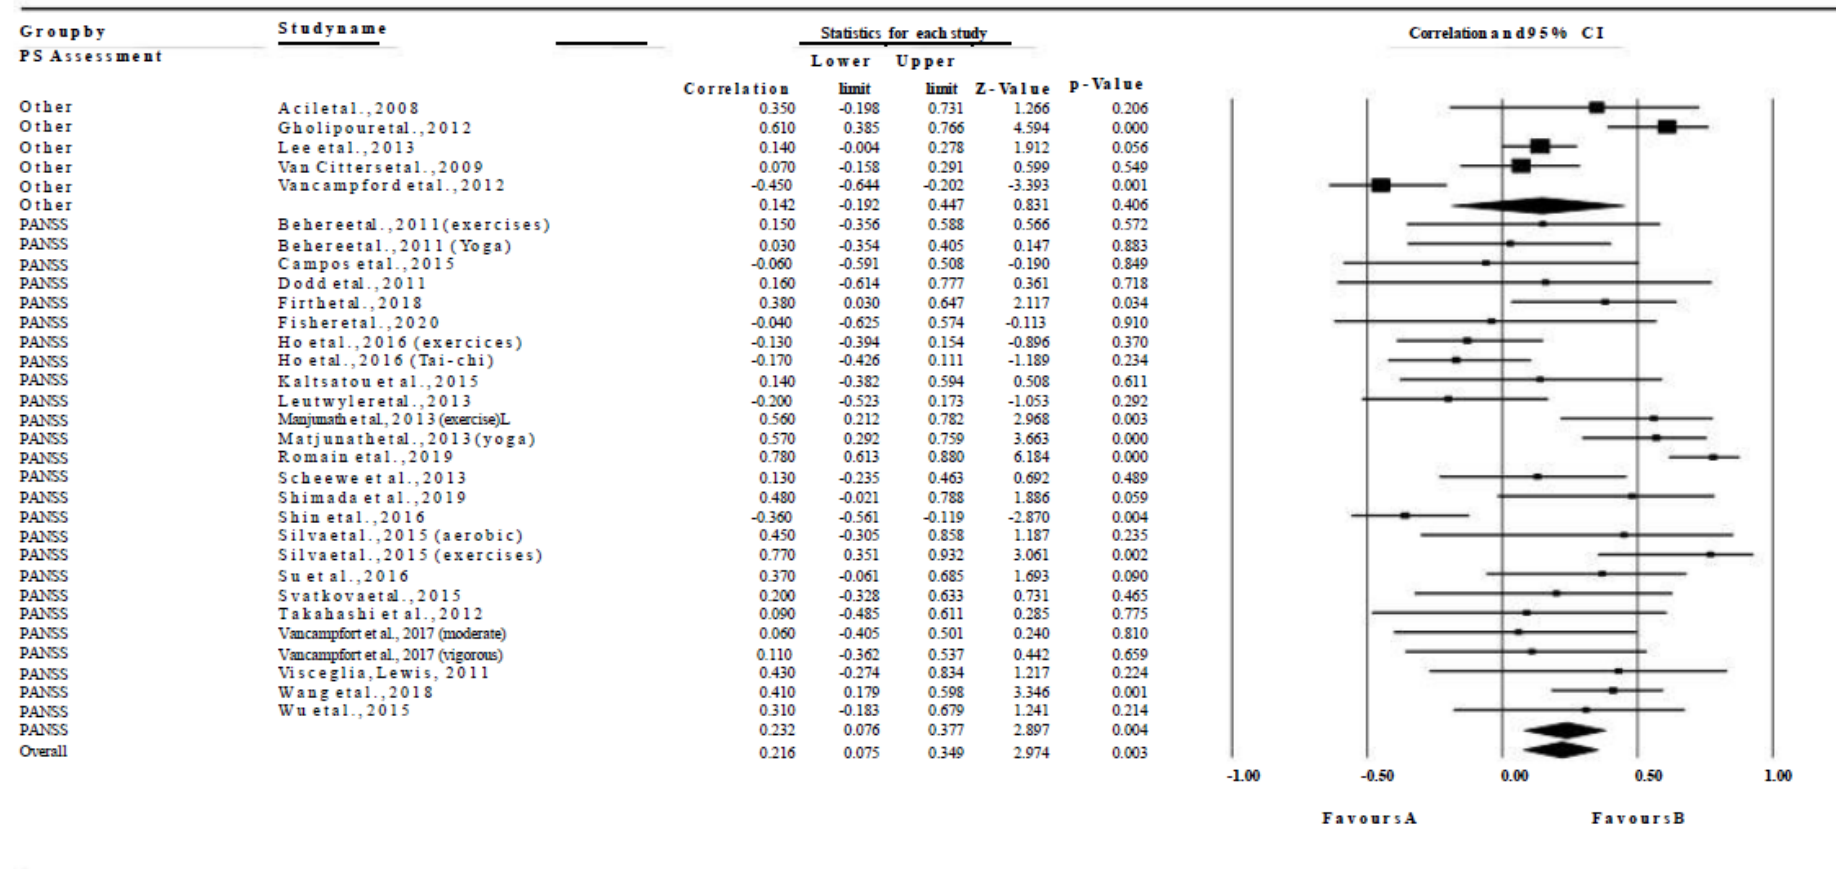

*Note:* PANSS = Positive and Negative Symptoms Scale; Other = other scales to assess the severity of positive symptoms; RCT = randomized controlled trials/controlled trials; EX = longitudinal studies with an intervention, no control group; L = observational-longitudinal studies; CS = observational—cross sectional studies.

**Table S15**

*Moderating Effects of the Study Quality in All Studies Included – Negative Symptoms*

## Meta Analysis

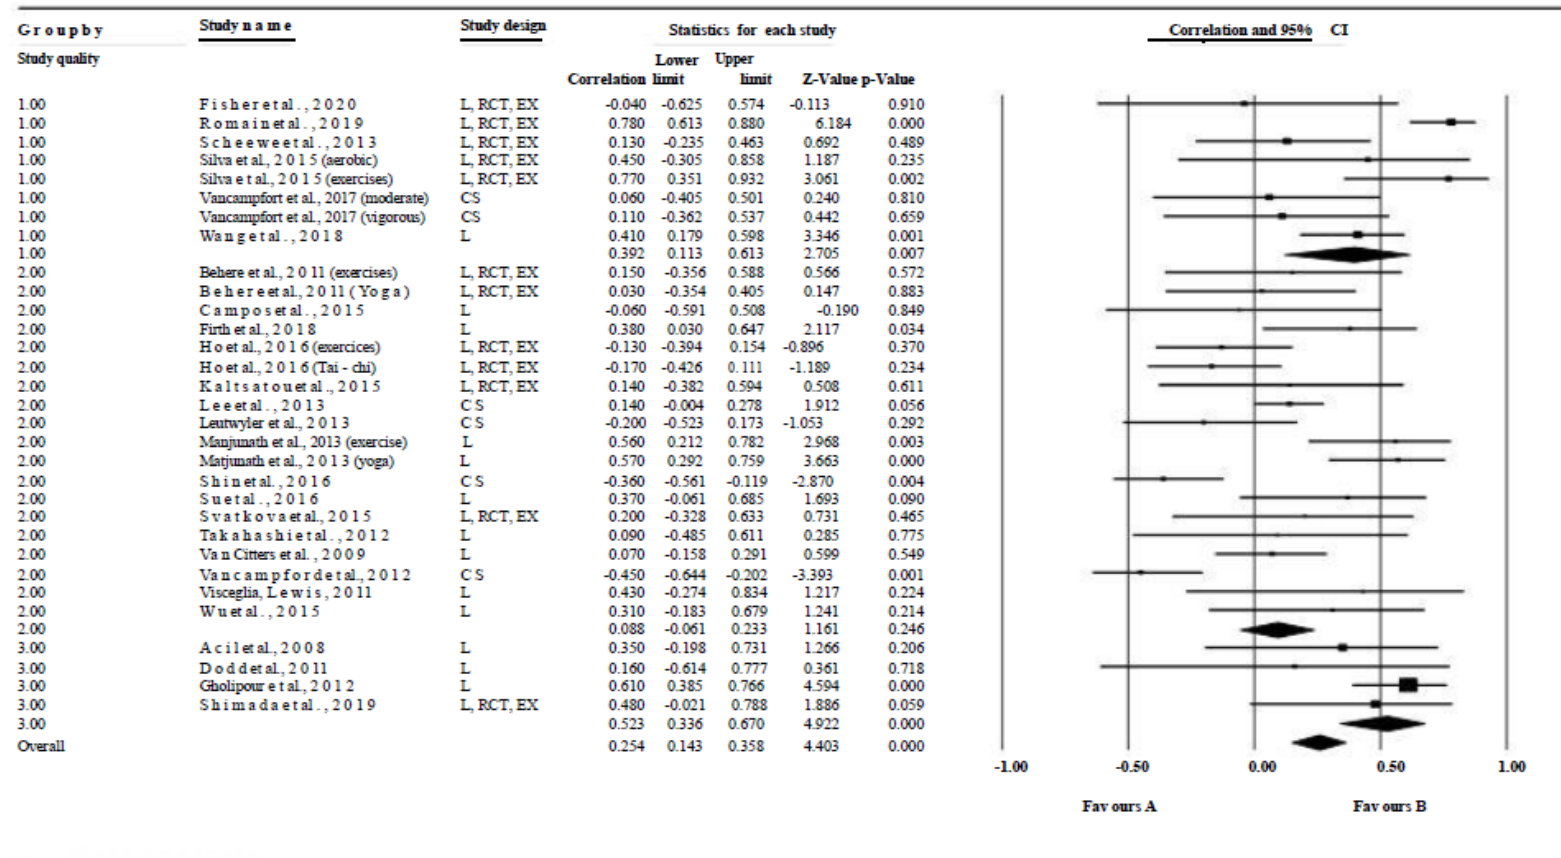

*Note:* 1 = studies with a high level of quality, 2 = studies with a moderate level of quality, 3 = studies with a low level of quality; RCT = randomized controlled trials/controlled trials; EX = longitudinal studies with an intervention, no control group; L = observational-longitudinal studies; CS = observational—cross sectional studies.

Table S16

*Moderating Effects of the Type of Physical Activity Intervention – Negative Symptoms*

## Meta Analysis

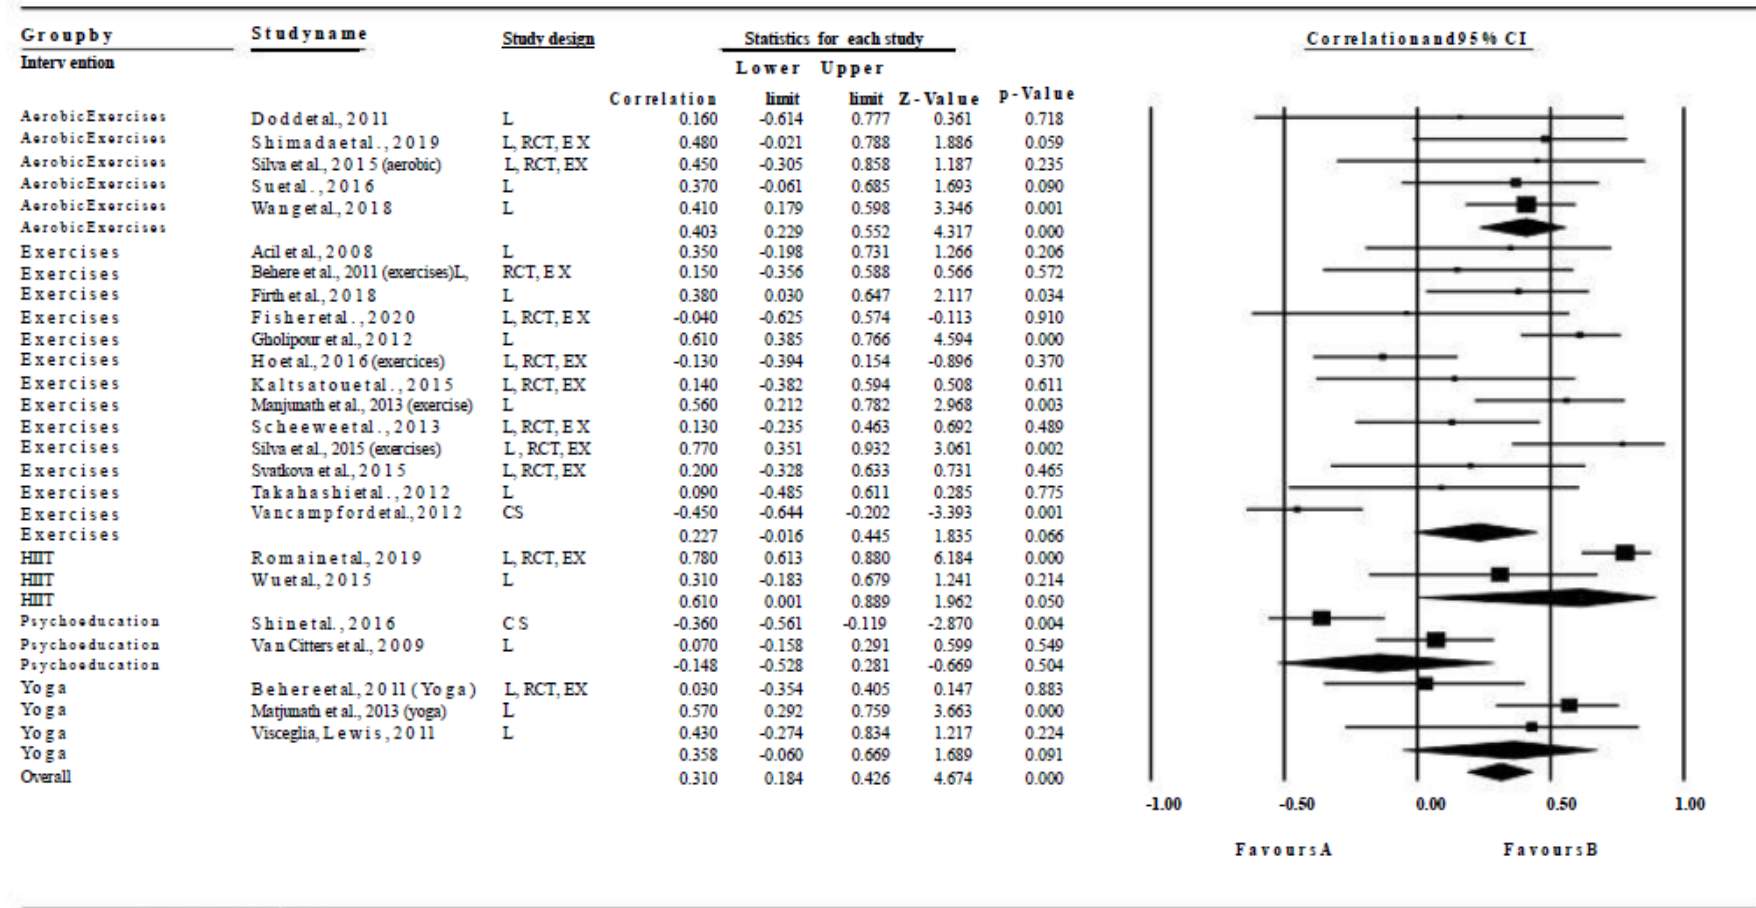

*Note:* Aerobic Exercises = studies with aerobic exercises interventions; Exercise = studies with interventions with various types of exercise intervention, different from aerobic exercises or HIIT (e.g., resistance exercise); HIIT = studies with high intensity interval training;

Psychoeducation = studies with psychosocial intervention; Yoga = studies with yoga training only; RCT = randomized controlled trials/controlled trials ; EX = longitudinal studies with an intervention, no control group; L = observational-longitudinal studies; CS = observational—cross sectional studies.

**Table S17**

*Moderating Effects of the Type of Combined Physical Activity Intervention – Negative Symptoms*

## Meta Analysis

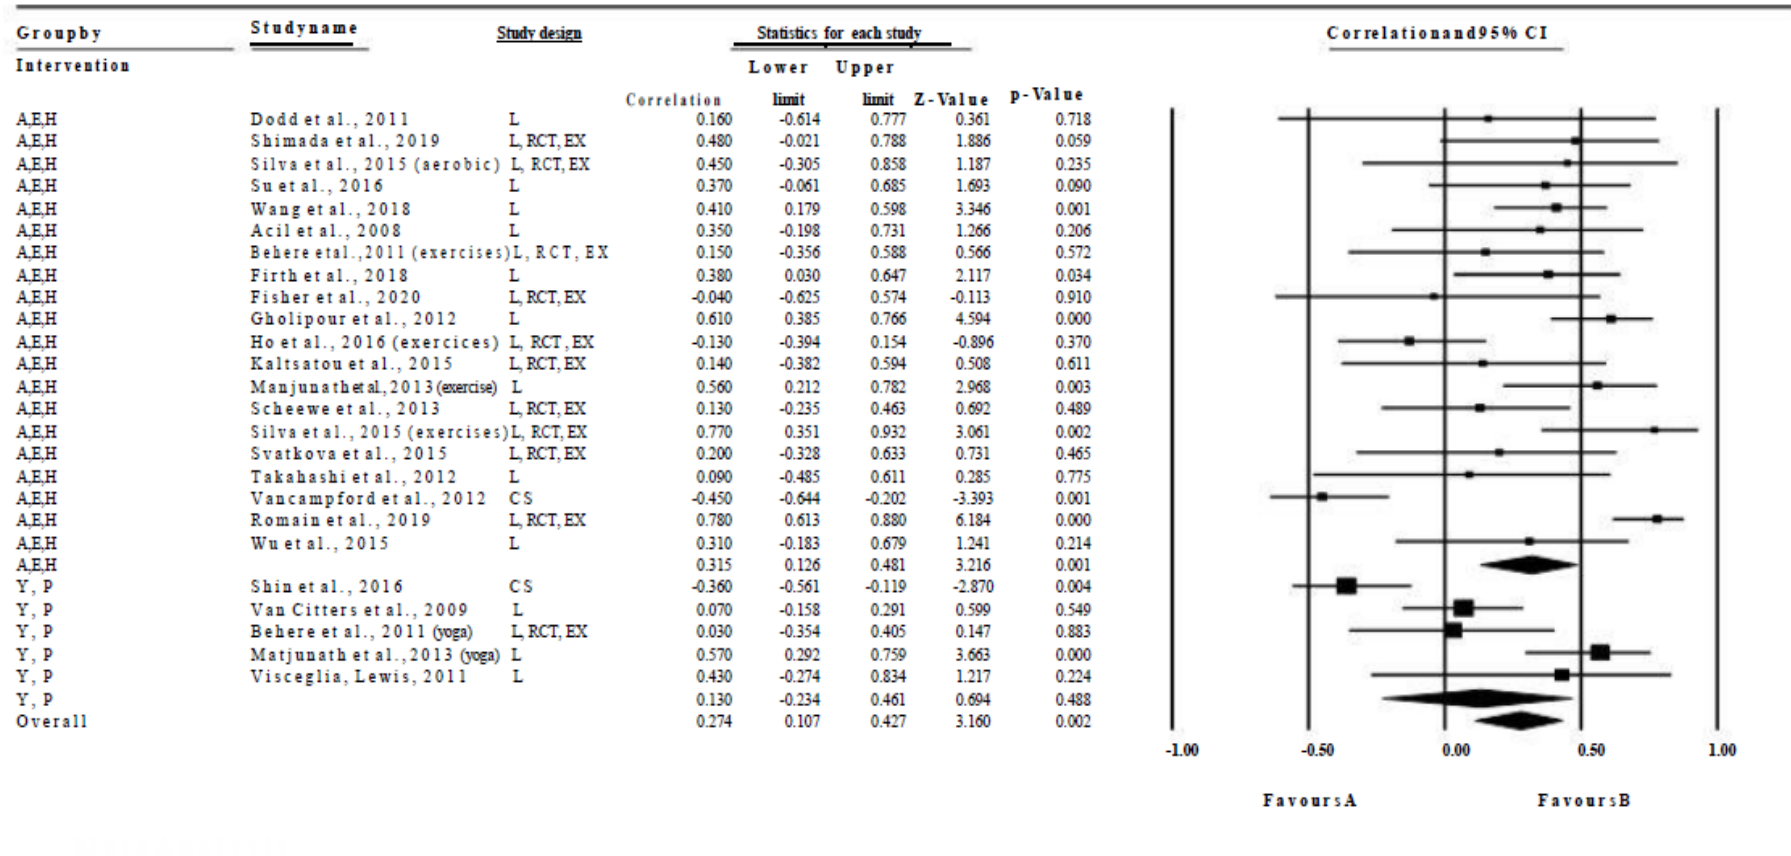

*Note:* A = Aerobic exercises; E = exercises; H = High intensity interval training; P = psychoeducation; Y = yoga; RCT = randomized controlled trials/controlled trials; EX = longitudinal studies with an intervention, no control group; L = observational-longitudinal studies; CS = observational—cross sectional studies.

**Table S18***Overall Effects for Randomized Controlled Trials Included - Negative Symptoms***Meta Analysis**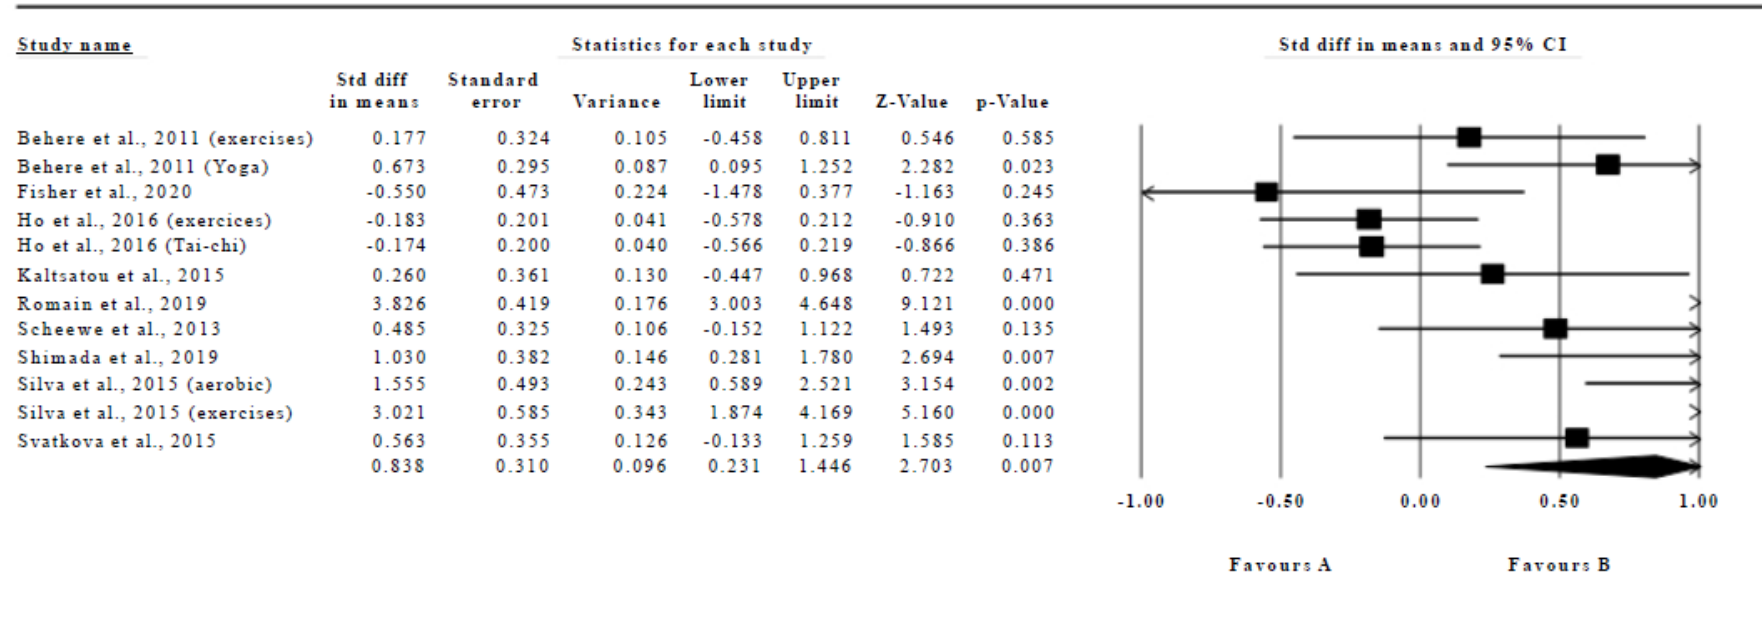

**Table S19**

*Moderating Effects of the Type of Diagnosis in Randomized Controlled Trials Included - Negative Symptoms*

## Meta Analysis

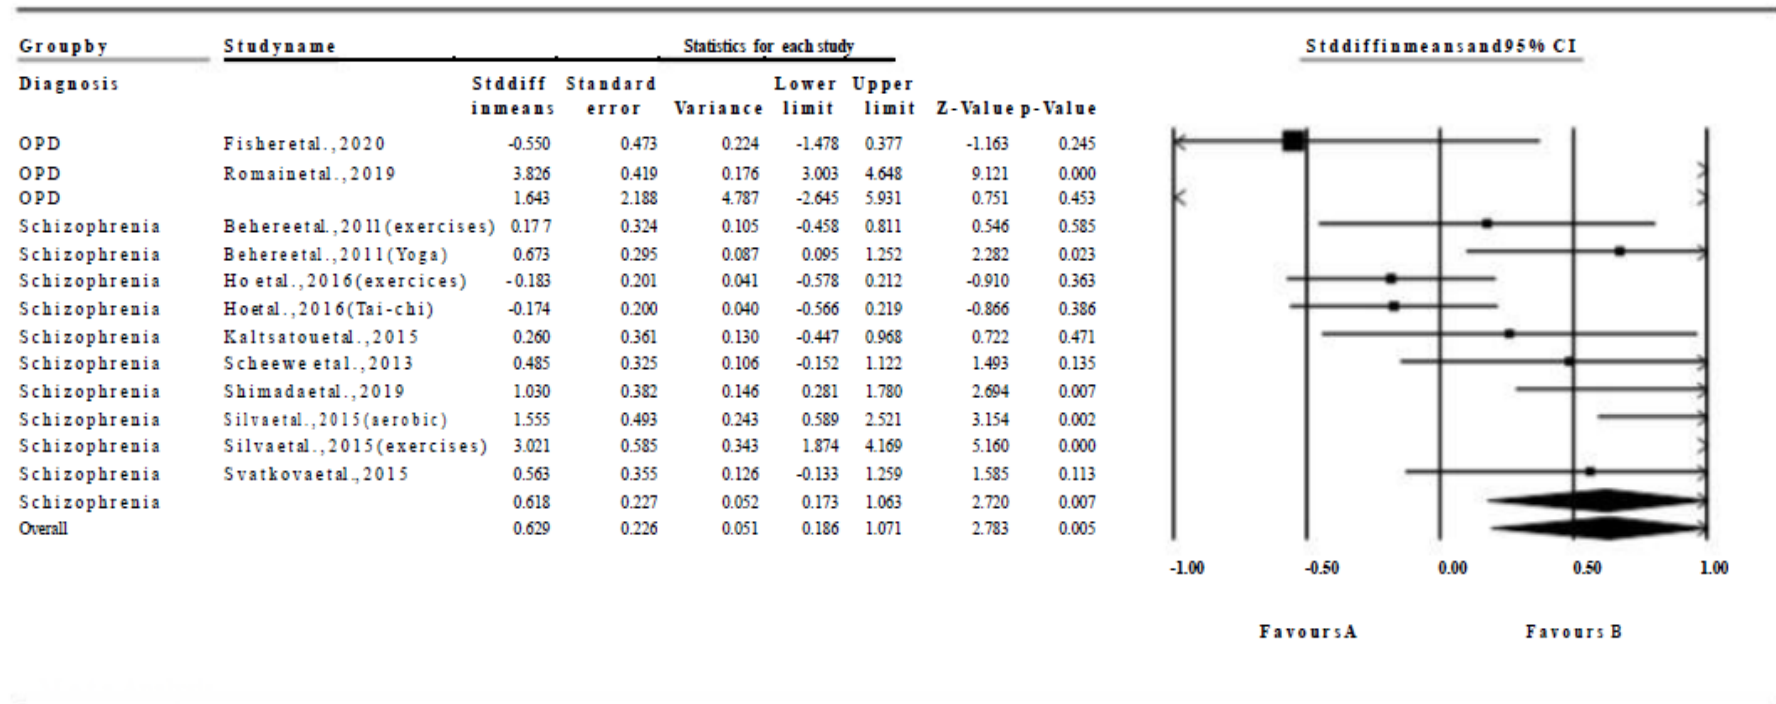

*Note:* Schizophrenia = studies enrolled people with diagnosed schizophrenia; OPD = studies enrolled people with other psychotic disorders diagnosed; RCT = randomized controlled trials/ controlled trials.

**Table S20**

*Moderating Effects of the Type of Physical Activity Intervention in Randomized Controlled Trials/ Controlled Trials - Negative Symptoms*

## M e t a Analysis

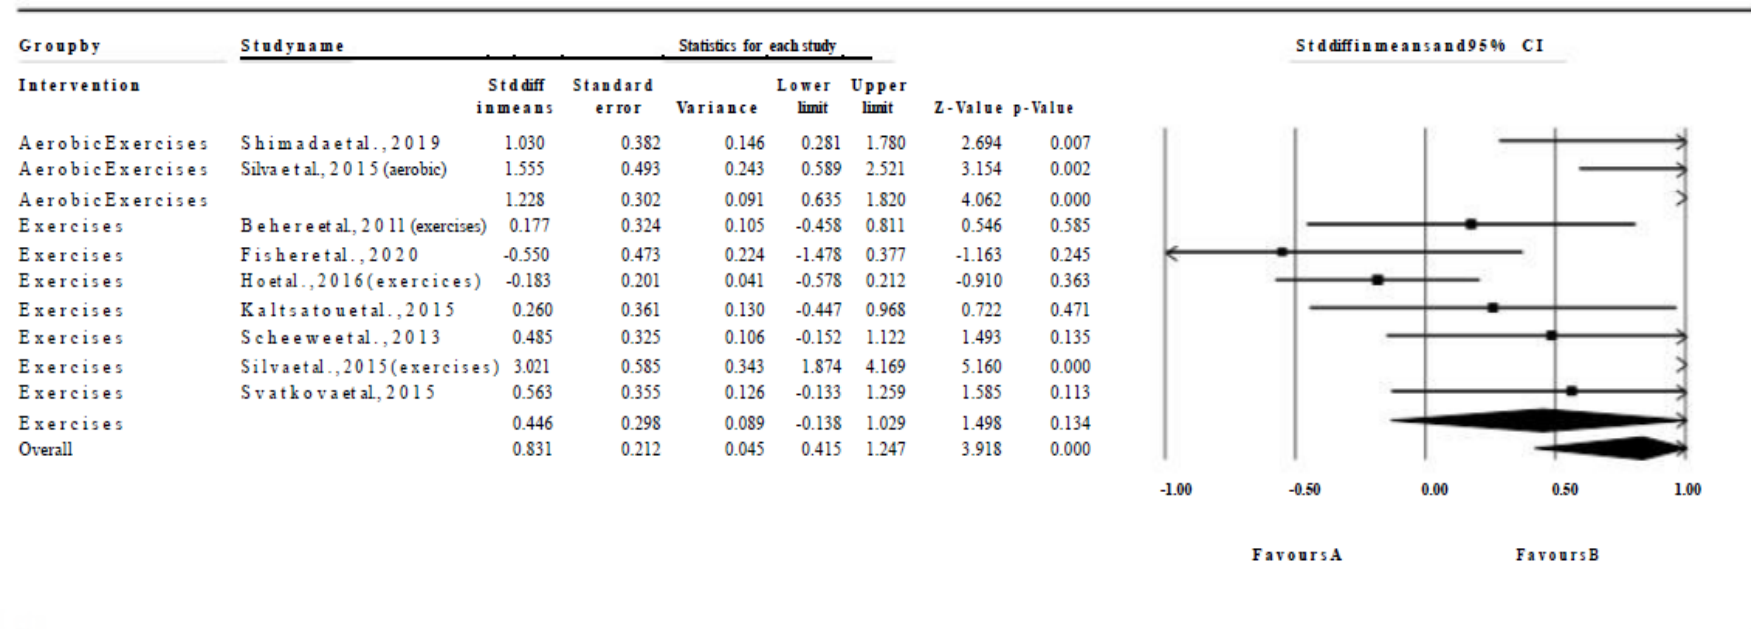

*Note:* RCT = randomized controlled trial/ controlled trials; Aerobic Exercises = studies with aerobic exercises intervention; Exercises = studies with interventions with various types of exercise intervention, other than HIIT or aerobic exercises (e.g. resistance training).



**Table S21***Overall Effects for All Type of Studies Included - General Psychopathology*

## Meta Analysis

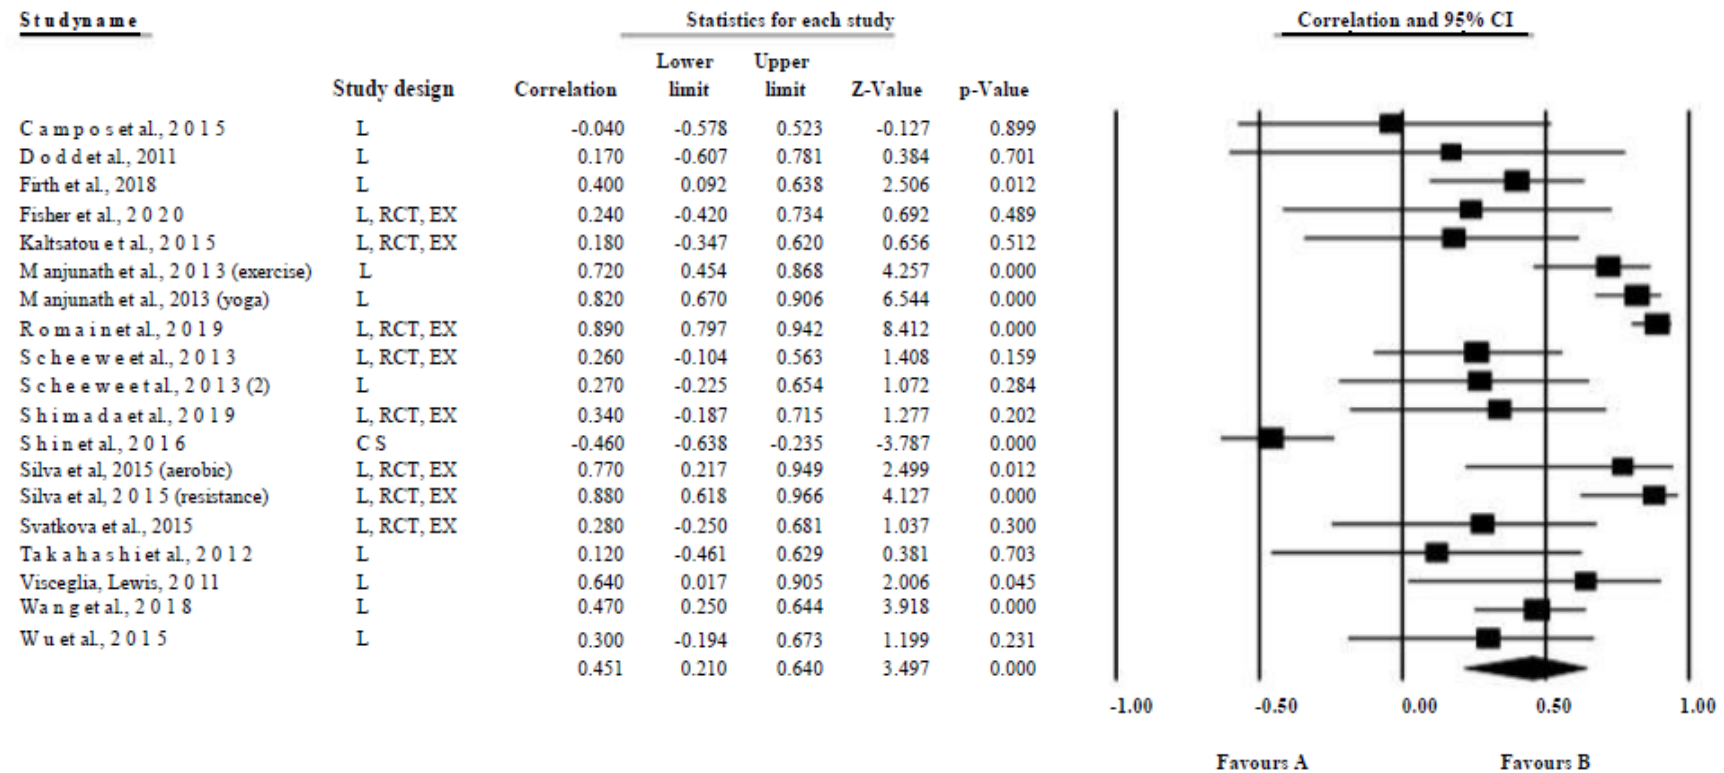

*Note:* RCT = randomized controlled trials/controlled trials; EX = longitudinal studies with an intervention, no control group; L = observational-longitudinal studies; CS = observational—cross sectional studies.

**Table S22**

*Moderating Effects of the Study Design in all Studies Included – General Psychopathology*

## Meta Analysis

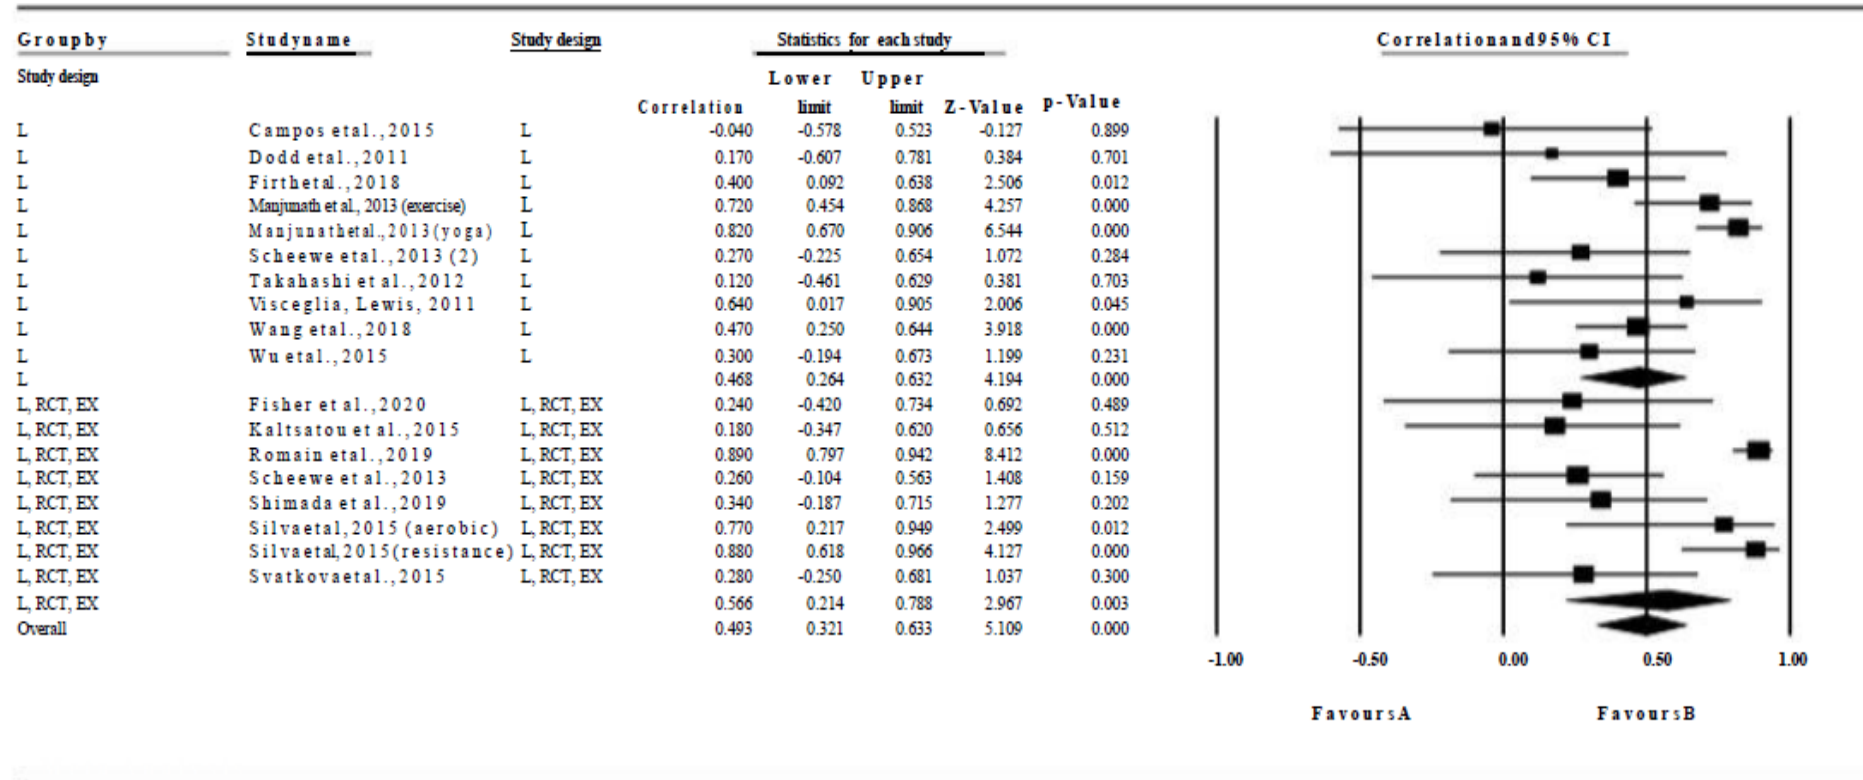

*Note:* RCT = randomized controlled trials/controlled trials; EX = longitudinal studies with an intervention, no control group; L = observational-longitudinal studies; CS = observational—cross sectional studies.

**Table S23**

*Moderating Effects of the Type of Diagnosis of Psychotic Disorders in All Studies Included – General Psychopathology*

## Meta Analysis

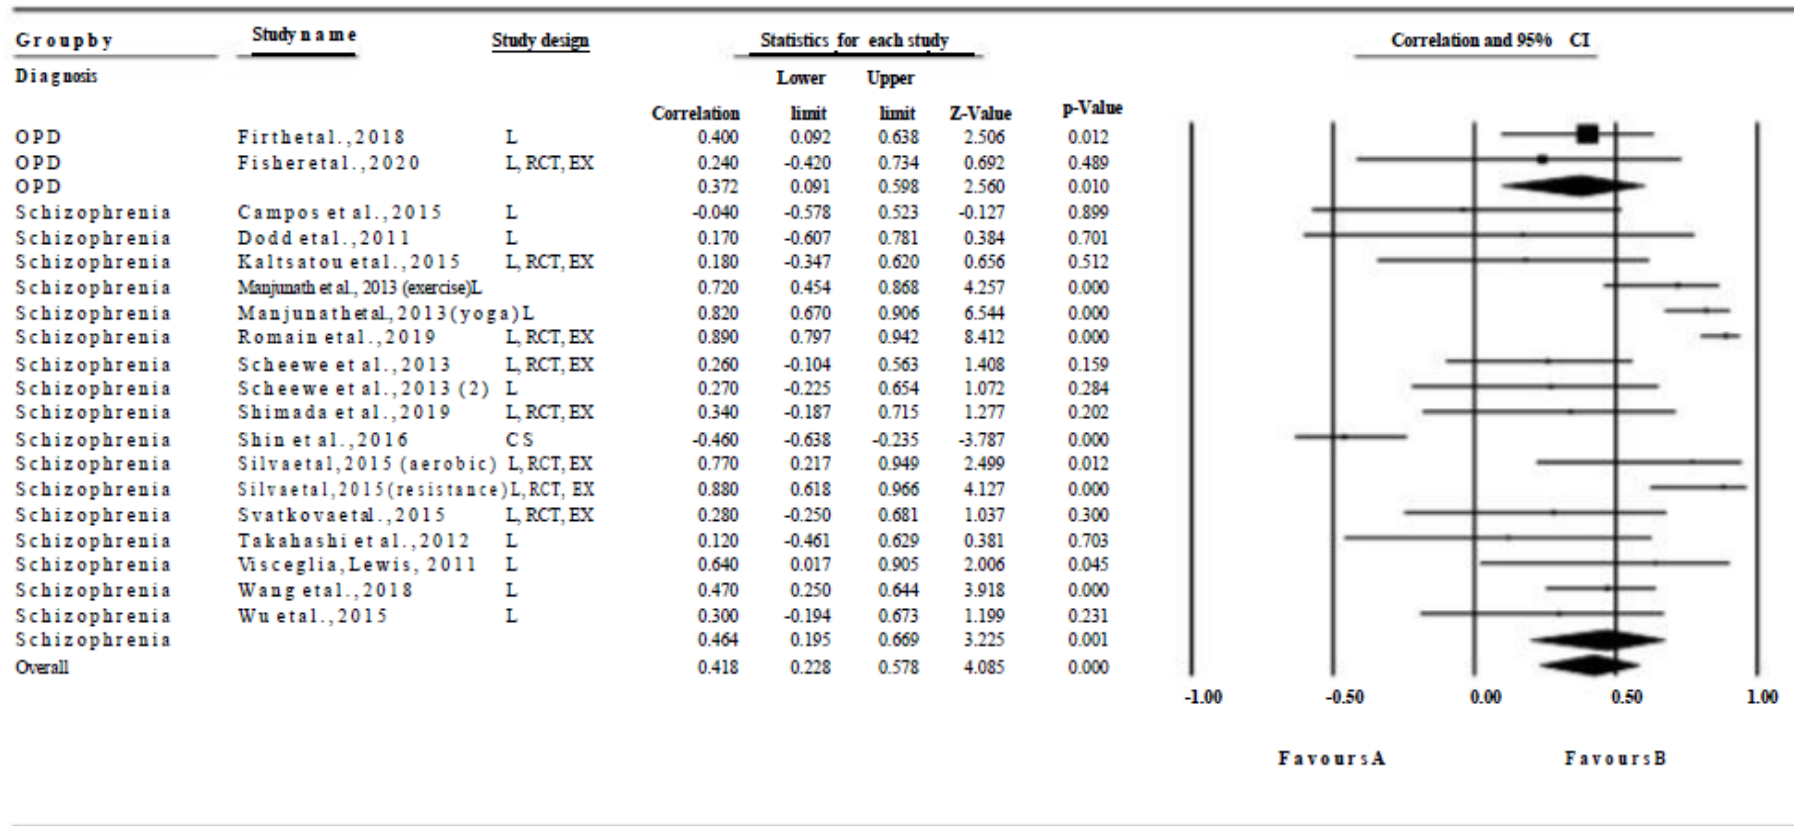

*Note:* Schizophrenia = studies enrolled people with diagnosed schizophrenia; OPD = studies enrolled people with other psychotic disorders diagnosed; RCT = randomized controlled trials/controlled trials; EX = longitudinal studies with an intervention, no control group; L = observational-longitudinal studies; CS = observational—cross sectional studies.

**Table S24***Moderating Effects of the Study Quality in All Studies Included – General Psychopathology***Meta Analysis**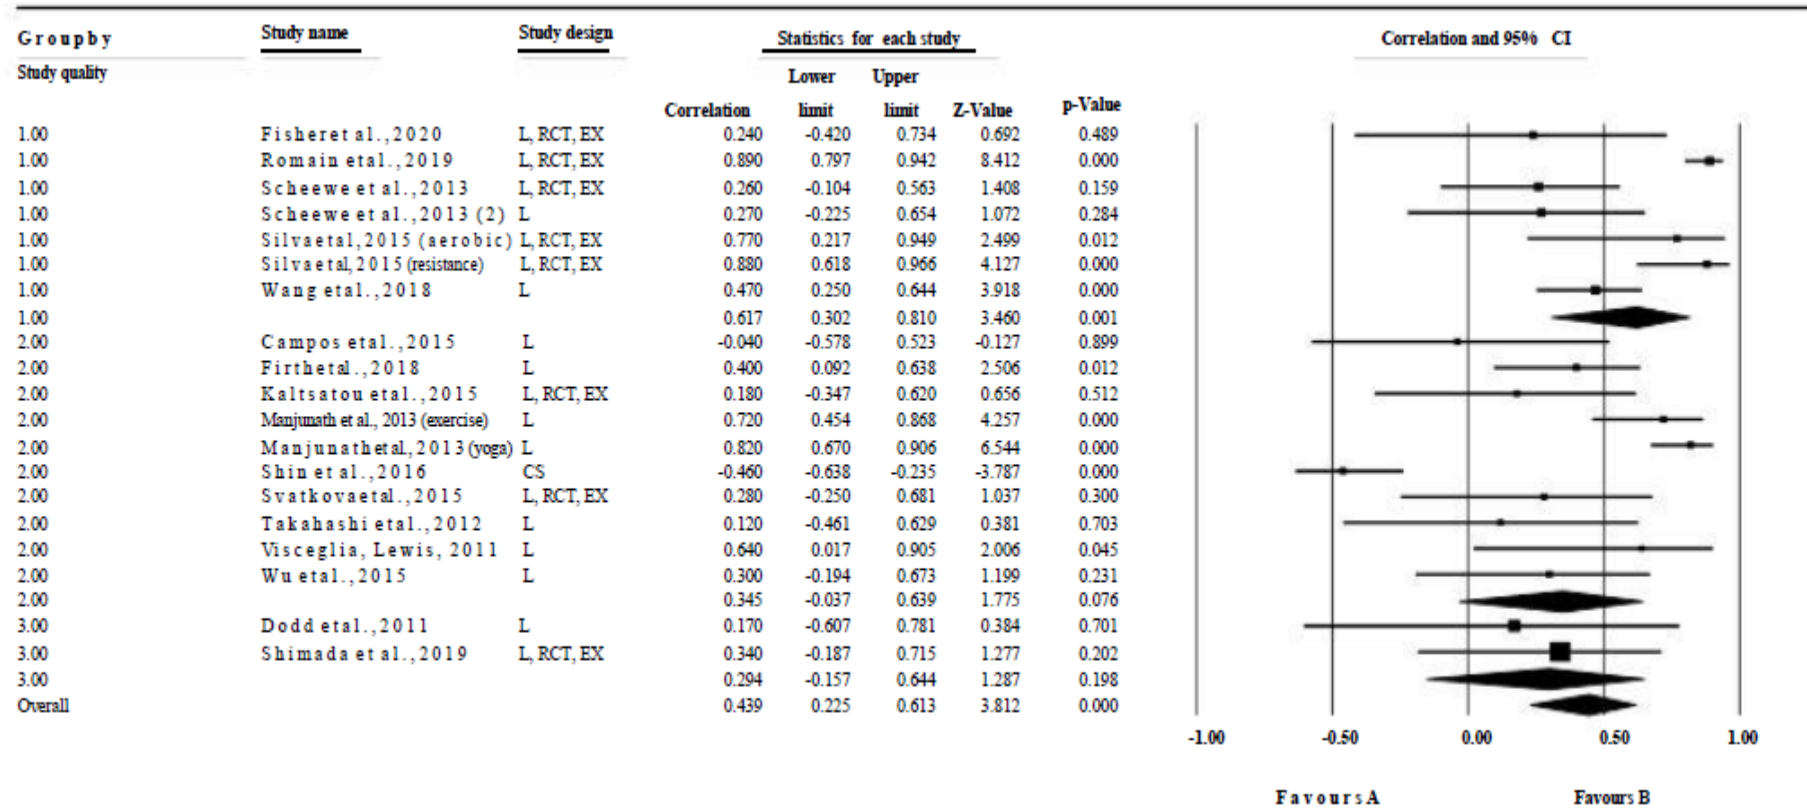

*Note:* 1 = studies with a high level of quality, 2 = studies with a moderate level of quality, 3 = studies with a high level of quality; RCT = randomized controlled trials/controlled trials; EX = longitudinal studies with an intervention, no control group; L = observational-longitudinal studies; CS = observational—cross sectional studies.

**Table S25***Moderating Effects of the Type of Physical Activity Intervention – General Psychopathology***Meta Analysis**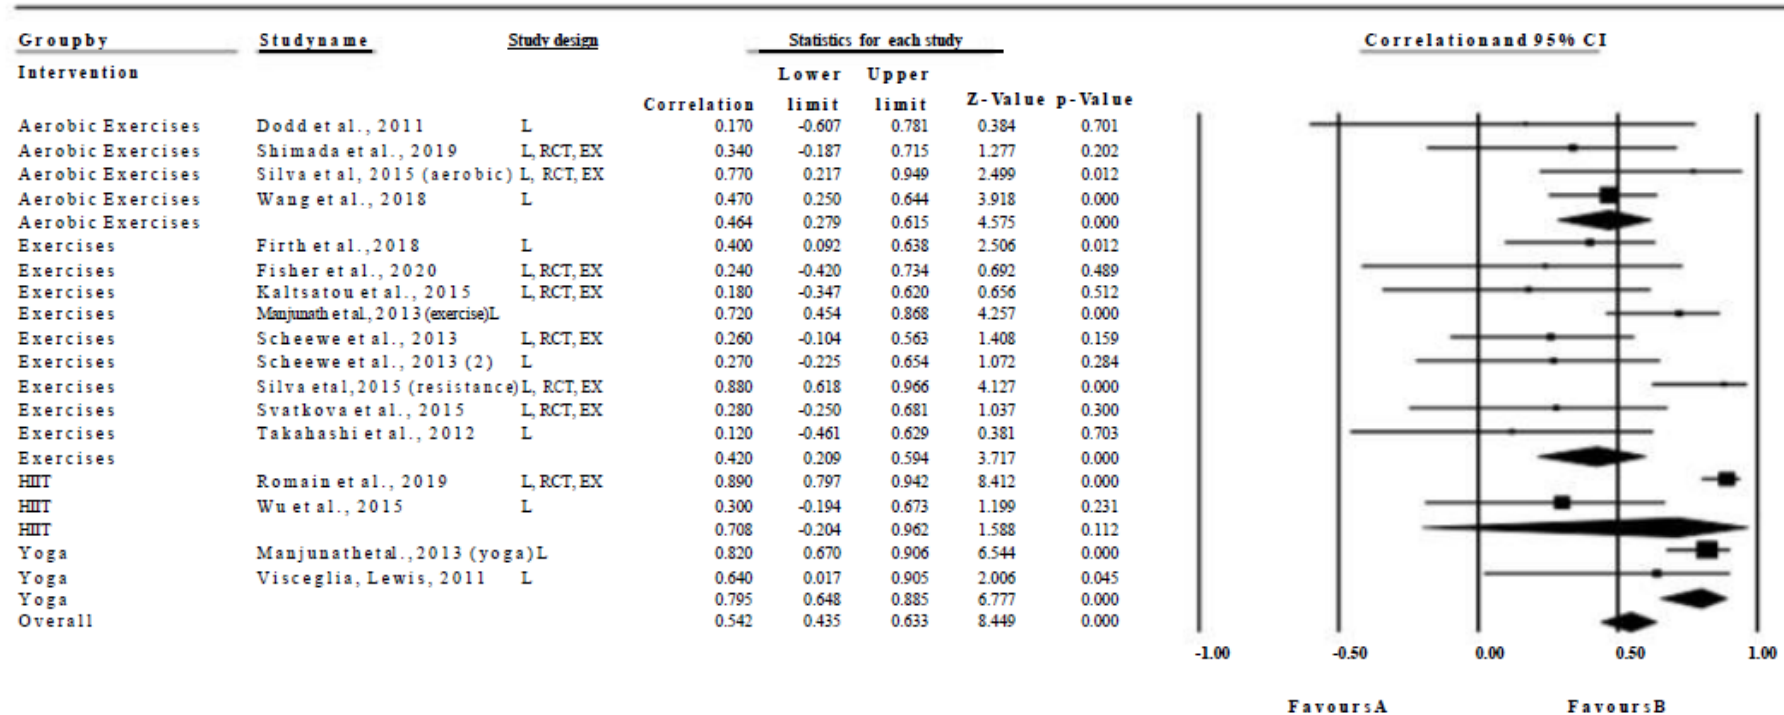

*Note:* Aerobic Exercises = studies included aerobic exercises interventions; Exercise = studies included interventions with various types of exercises (e.g., resistance exercise); HIIT = studies enrolled high intensity interval training; Yoga = studies enrolled yoga training only; RCT = randomized controlled trials/controlled trials; EX = longitudinal studies with an intervention, no control group; L = observational-longitudinal studies; CS = observational—cross sectional studies.

**Table S26***Moderating Effects of Combined Physical Activity Intervention – General Psychopathology*

## M e t a Analysis

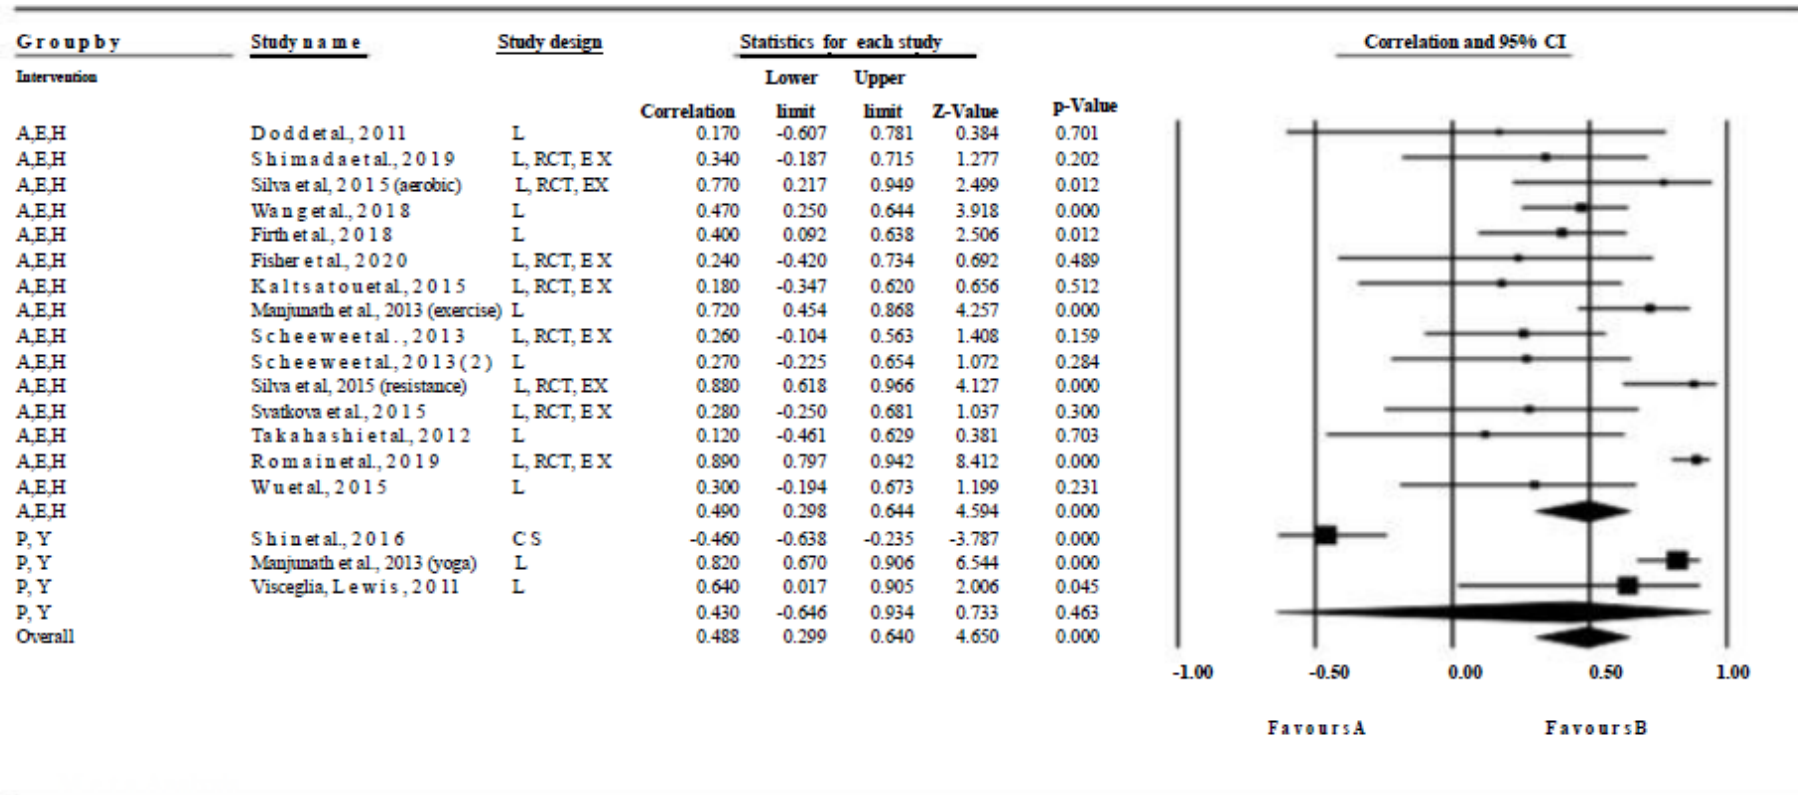

*Note:* A = Aerobic exercises; E = exercises; H = High intensity interval training; P = psychoeducation; Y = yoga; RCT = randomized controlled trials/controlled trials EX = longitudinal studies with an intervention, no control group; L = observational-longitudinal studies; CS = observational—cross sectional studies.

**Table S27***Overall Effects for All Randomized Controlled Trials Included - General Psychopathology***Meta Analysis**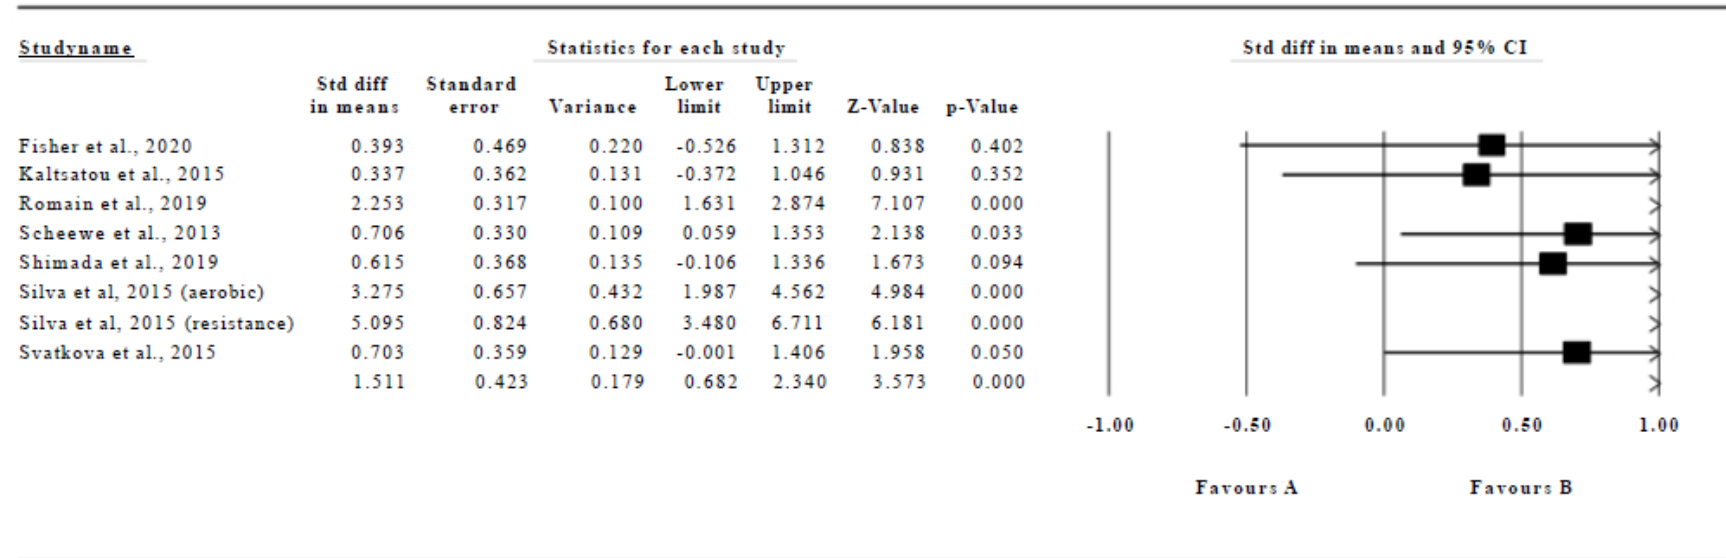



**Table S28**

*Moderating Effects of the Type of Physical Activity Intervention in Randomized Controlled Trials – General Psychopathology*

## Meta Analysis

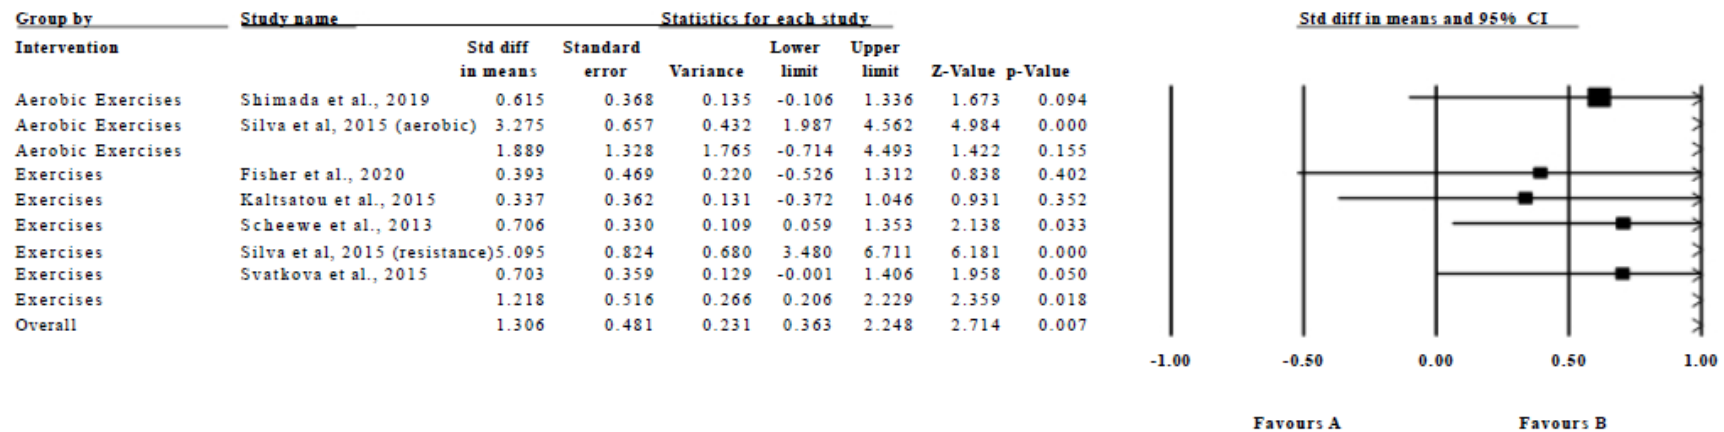

*Note:* Aerobic Exercises = studies included aerobic exercises interventions; Exercises = studies included interventions with various types of exercise, other than aerobic exercise or HIIT (e.g., resistance exercise).
